# Supplementary material for: Asymmetric synthesis of enantioenriched α-allyl esters through Pd(BINAPHANE)-catalysed allylation of disubstituted ketenes
Source: Royal Society of Chemistry journal article supplement (doi:10.1039/d4cc00057a), 2024-01-01

# Asymmetric Synthesis of Enantioenriched $\alpha$ -Allyl Esters through Pd(BINAPHANE)-Catalysed Allylation of Disubstituted Ketenes

Ahmad A. Ibrahim,<sup>b</sup> Stephen C. J. O'Reilly,<sup>a</sup> Margot Bottarel<sup>a</sup> and Nessian J. Kerrigan<sup>a,\*</sup>

<sup>a</sup> School of Chemical Sciences and Life Sciences Institute, Dublin City University, Glasnevin, Dublin 9, Ireland.

<sup>b</sup> Department of Chemistry, Oakland University, 2200 N. Squirrel Road, Rochester, MI 48309-4477, USA.

## NMR and GC/HPLC spectra

### Table of Contents:

|                                                         |    |
|---------------------------------------------------------|----|
| HPLC of ( $\pm$ )- <b>3i</b>                            | 3  |
| HPLC of (+)- <b>3i</b>                                  | 4  |
| <sup>1</sup> H & <sup>13</sup> C NMR of (+)- <b>3i</b>  | 5  |
| HPLC of ( $\pm$ )- <b>3j</b>                            | 6  |
| HPLC of <b>3j</b>                                       | 7  |
| <sup>1</sup> H & <sup>13</sup> C NMR of <b>3j</b>       | 8  |
| HPLC of ( $\pm$ )- <b>3k</b>                            | 9  |
| HPLC of (–)- <b>3k</b>                                  | 10 |
| <sup>1</sup> H & <sup>13</sup> C NMR of (–)- <b>3k</b>  | 11 |
| GC-MS trace of amide derivative of ( $\pm$ )- <b>3l</b> | 12 |
| GC-MS trace of amide derivative of (–)- <b>3l</b>       | 12 |
| <sup>1</sup> H & <sup>13</sup> C NMR of (–)- <b>3l</b>  | 13 |
| HPLC of ( $\pm$ )- <b>3m</b>                            | 14 |
| HPLC of (+)- <b>3m</b>                                  | 15 |
| <sup>1</sup> H & <sup>13</sup> C NMR of (+)- <b>3m</b>  | 16 |
| HPLC of ( $\pm$ )- <b>3n</b>                            | 17 |
| HPLC of (+)- <b>3n</b>                                  | 18 |
| <sup>1</sup> H & <sup>13</sup> C NMR of (+)- <b>3n</b>  | 19 |
| HPLC of ( $\pm$ )- <b>3p</b>                            | 20 |
| HPLC of (+)- <b>3p</b>                                  | 21 |
| <sup>1</sup> H & <sup>13</sup> C NMR of (+)- <b>3p</b>  | 22 |
| HPLC of ( $\pm$ )- <b>3q</b>                            | 23 |
| HPLC of (+)- <b>3q</b>                                  | 24 |

|                                                      |    |
|------------------------------------------------------|----|
| $^1\text{H}$ & $^{13}\text{C}$ NMR of (+)- <b>3q</b> | 25 |
| $^1\text{H}$ & $^{13}\text{C}$ NMR of <b>3r</b>      | 26 |
| HPLC of ( $\pm$ )- <b>3s</b>                         | 27 |
| HPLC of (-)- <b>3s</b>                               | 28 |
| $^1\text{H}$ & $^{13}\text{C}$ NMR of (-)- <b>3s</b> | 29 |
| HPLC of ( $\pm$ )- <b>3t</b>                         | 30 |
| HPLC of (+)- <b>3t</b>                               | 31 |
| $^1\text{H}$ & $^{13}\text{C}$ NMR of (+)- <b>3t</b> | 32 |
| HPLC of ( $\pm$ )- <b>3u</b>                         | 33 |
| HPLC of <b>3u</b>                                    | 34 |
| $^1\text{H}$ & $^{13}\text{C}$ NMR of <b>3u</b>      | 35 |
| HPLC of ( $\pm$ )- <b>3v</b>                         | 36 |
| HPLC of (+)- <b>3v</b>                               | 37 |
| $^1\text{H}$ & $^{13}\text{C}$ NMR of (+)- <b>3v</b> | 38 |
| HPLC of ( $\pm$ )- <b>3w</b>                         | 39 |
| HPLC of <b>3w</b>                                    | 40 |
| $^1\text{H}$ & $^{13}\text{C}$ NMR of <b>3w</b>      | 41 |
| $^1\text{H}$ & $^{13}\text{C}$ NMR of <b>3x</b>      | 42 |
| $^1\text{H}$ & $^{13}\text{C}$ NMR of <b>3y</b>      | 43 |

HPLC of (±)-3i:

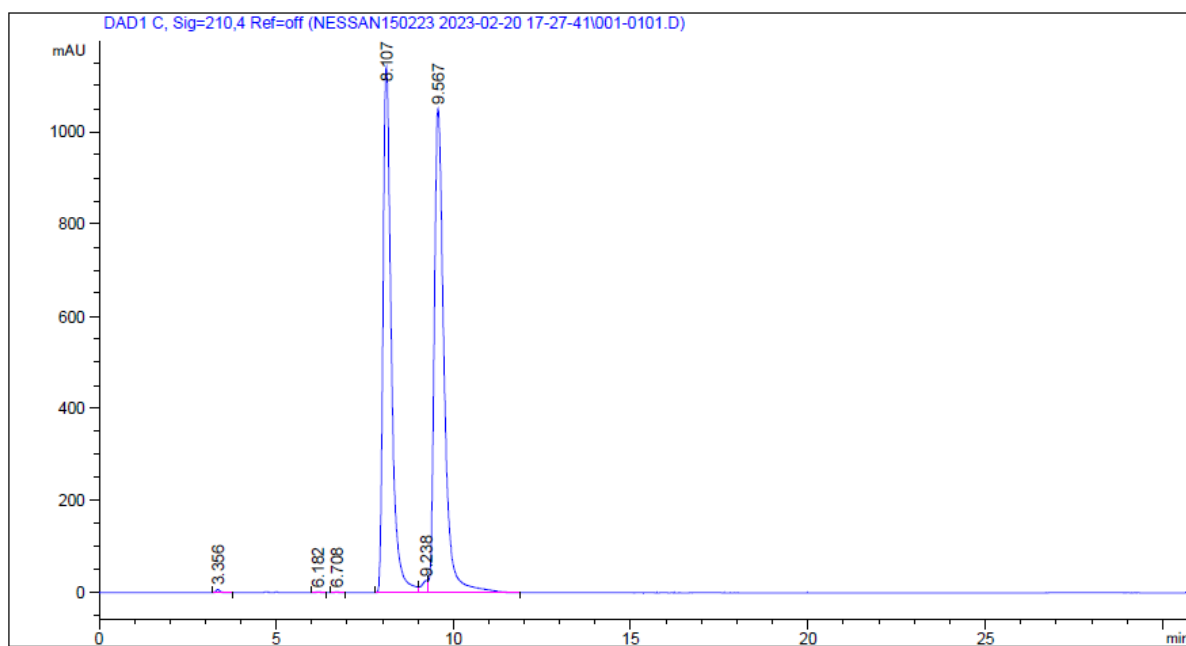

Signal 1: DAD1 C, Sig=210,4 Ref=off

| Peak # | RetTime [min] | Type | Width [min] | Area [mAU*s] | Height [mAU] | Area %  |
|--------|---------------|------|-------------|--------------|--------------|---------|
| 1      | 3.356         | BB   | 0.1070      | 44.62936     | 6.42699      | 0.1140  |
| 2      | 6.182         | BB   | 0.1442      | 14.27917     | 1.45929      | 0.0365  |
| 3      | 6.708         | BB   | 0.1621      | 11.94839     | 1.16054      | 0.0305  |
| 4      | 8.107         | BV   | 0.2481      | 1.85771e4    | 1140.04211   | 47.4430 |
| 5      | 9.238         | VV   | 0.1727      | 306.72290    | 26.17441     | 0.7833  |
| 6      | 9.567         | VB   | 0.2923      | 2.02020e4    | 1050.69397   | 51.5928 |

Totals : 3.91567e4 2225.95731

HPLC of (+)-**3i**:

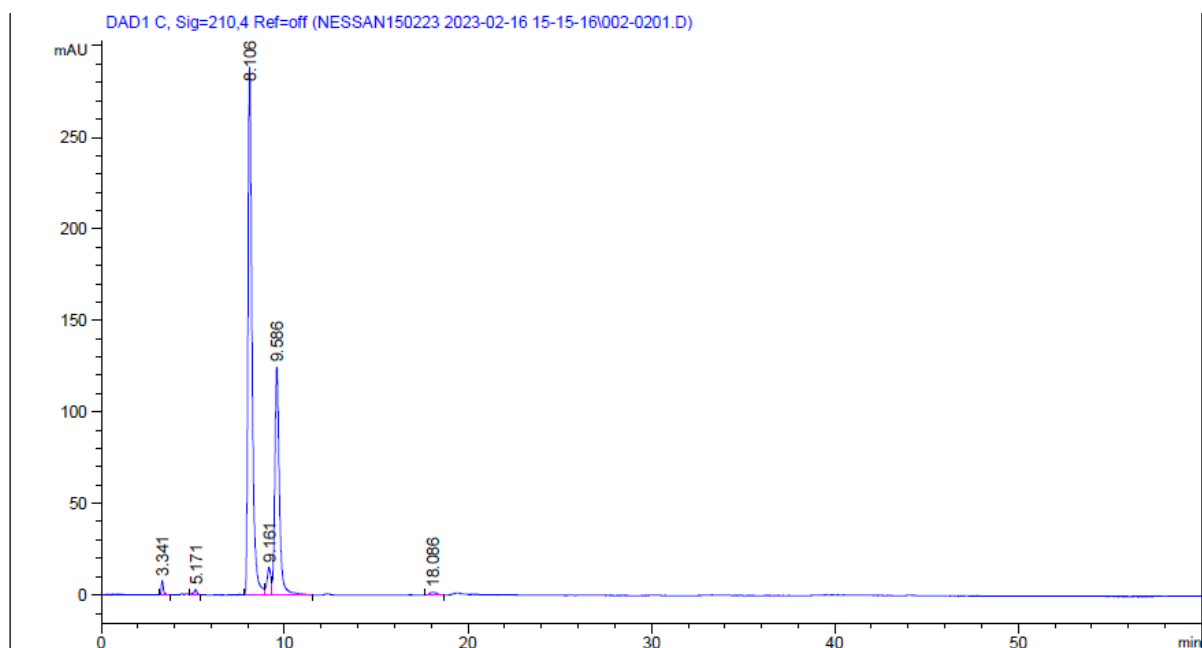

Signal 1: DAD1 C, Sig=210,4 Ref=off

| Peak # | RetTime [min] | Type | Width [min] | Area [mAU*s] | Height [mAU] | Area %  |
|--------|---------------|------|-------------|--------------|--------------|---------|
| 1      | 3.341         | BB   | 0.1154      | 57.99095     | 7.56438      | 0.8288  |
| 2      | 5.171         | BB   | 0.1628      | 33.83868     | 2.92869      | 0.4836  |
| 3      | 8.106         | BV   | 0.2314      | 4436.00781   | 288.53543    | 63.4000 |
| 4      | 9.161         | VV   | 0.2307      | 234.07767    | 15.27991     | 3.3455  |
| 5      | 9.586         | VB   | 0.2667      | 2188.69751   | 124.77144    | 31.2812 |
| 6      | 18.086        | BB   | 0.3137      | 46.24009     | 1.78814      | 0.6609  |

Totals : 6996.85271 440.86799

AI-13-85

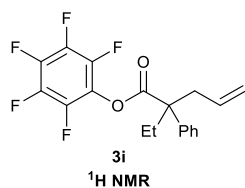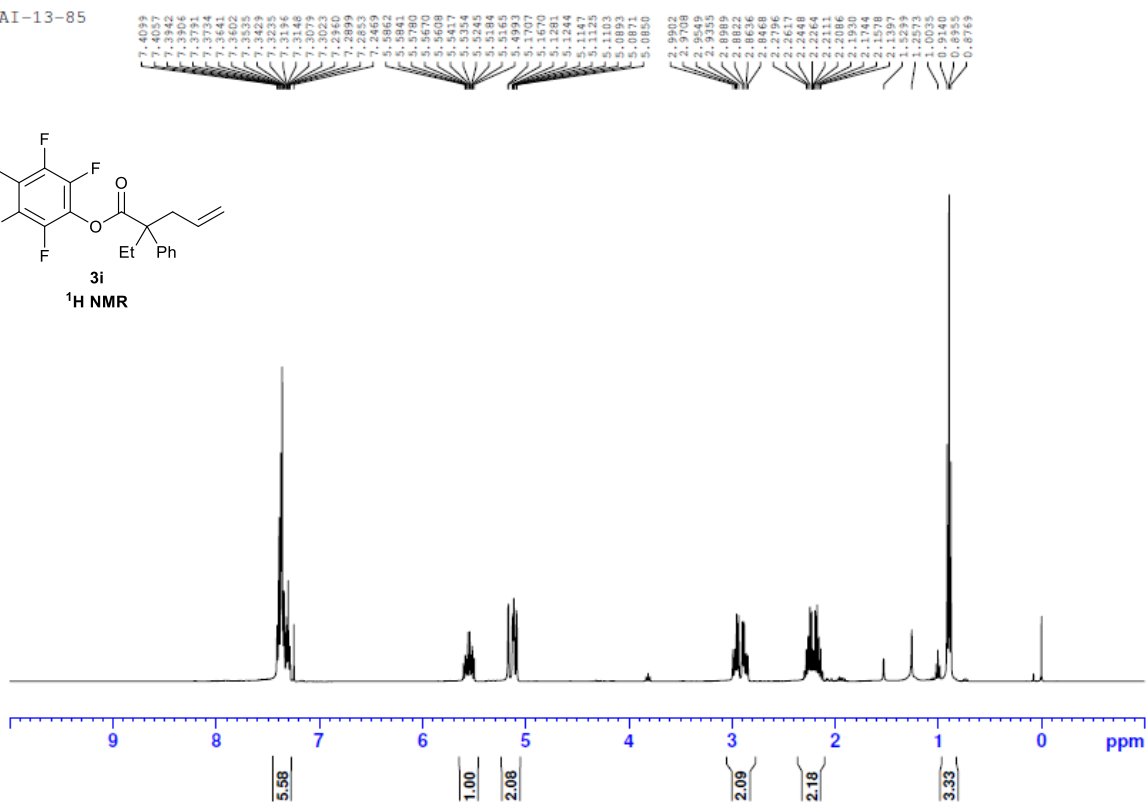

AI-13-85 13C

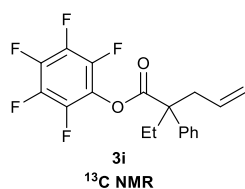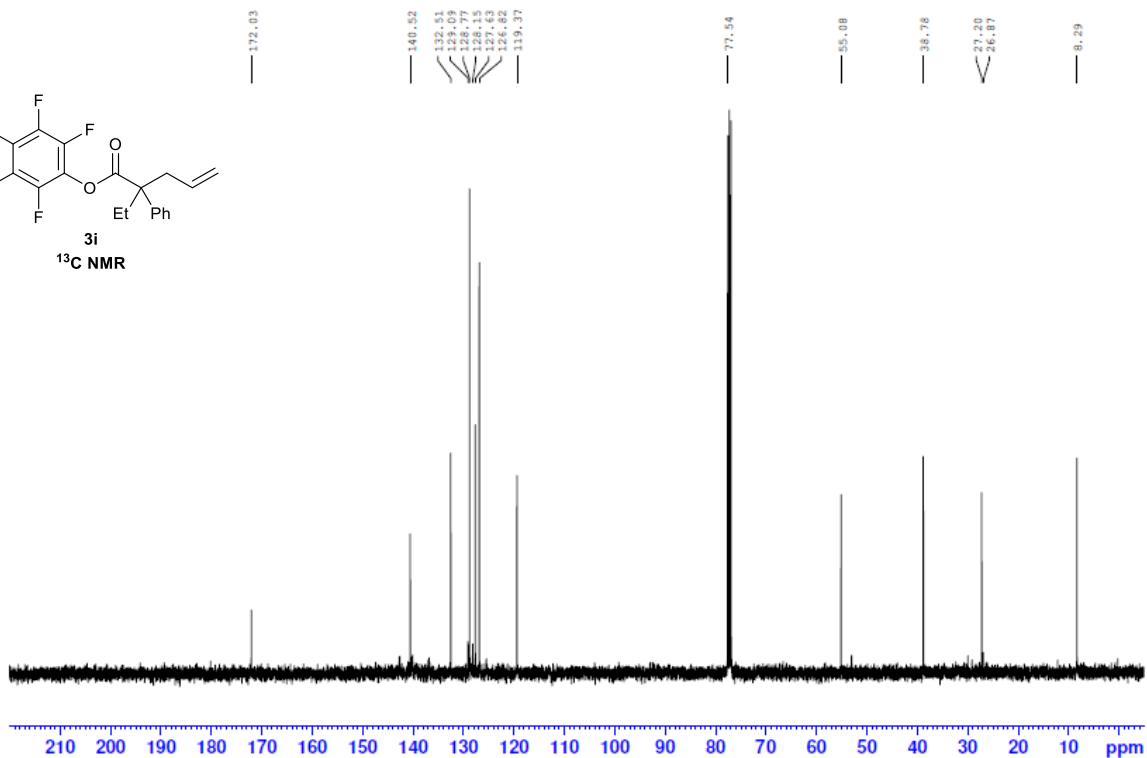

# HPLC of (±)-3j

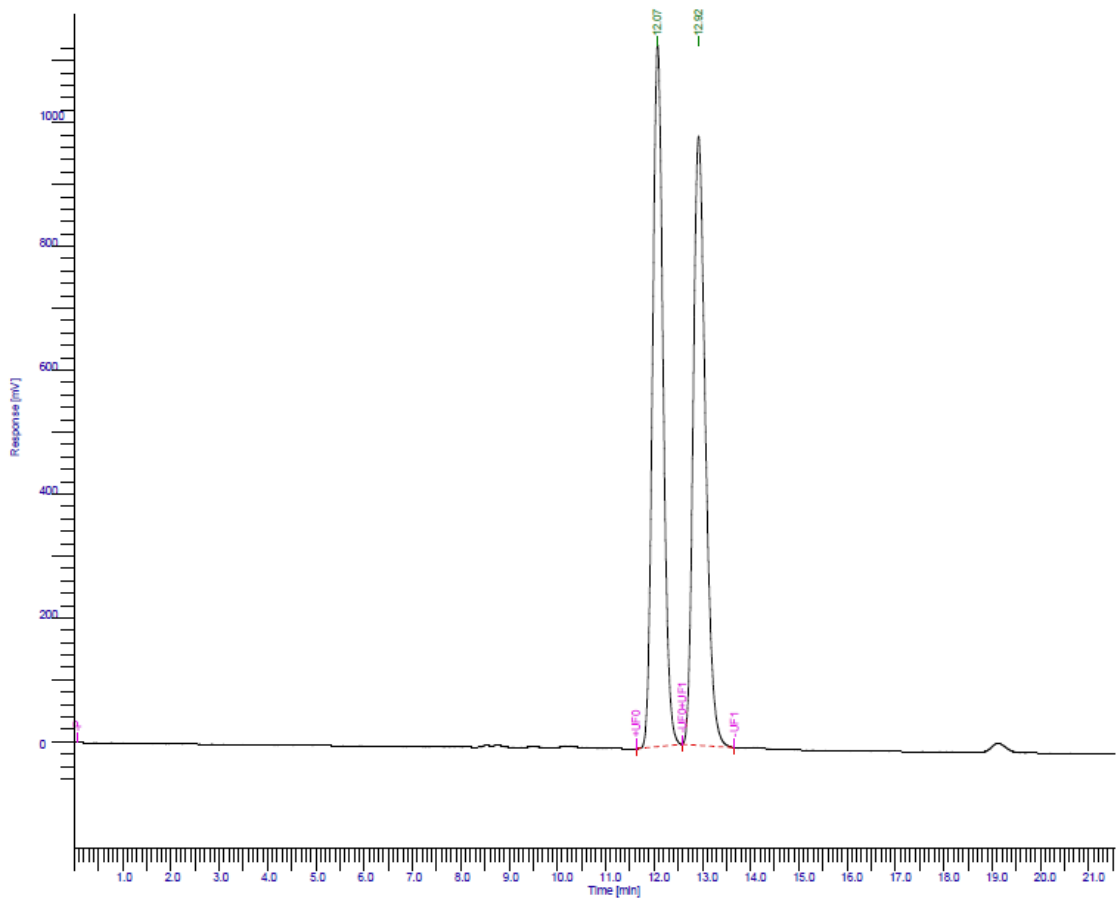

| Peak # | Time [min] | Area [ $\mu\text{V}\cdot\text{s}$ ] | Height [ $\mu\text{V}$ ] | Area [%] | Norm. Area [%] | BL  | Area/Height [s] |
|--------|------------|-------------------------------------|--------------------------|----------|----------------|-----|-----------------|
| 1      | 12.071     | 17310087.27                         | 1.13e+06                 | 49.96    | 49.96          | *MM | 15.2885         |
| 2      | 12.921     | 17340531.13                         | 983211.52                | 50.04    | 50.04          | *MM | 17.6366         |
|        |            | 34650618.40                         | 2.12e+06                 | 100.00   | 100.00         |     |                 |

HPLC of enantioenriched **3j**:

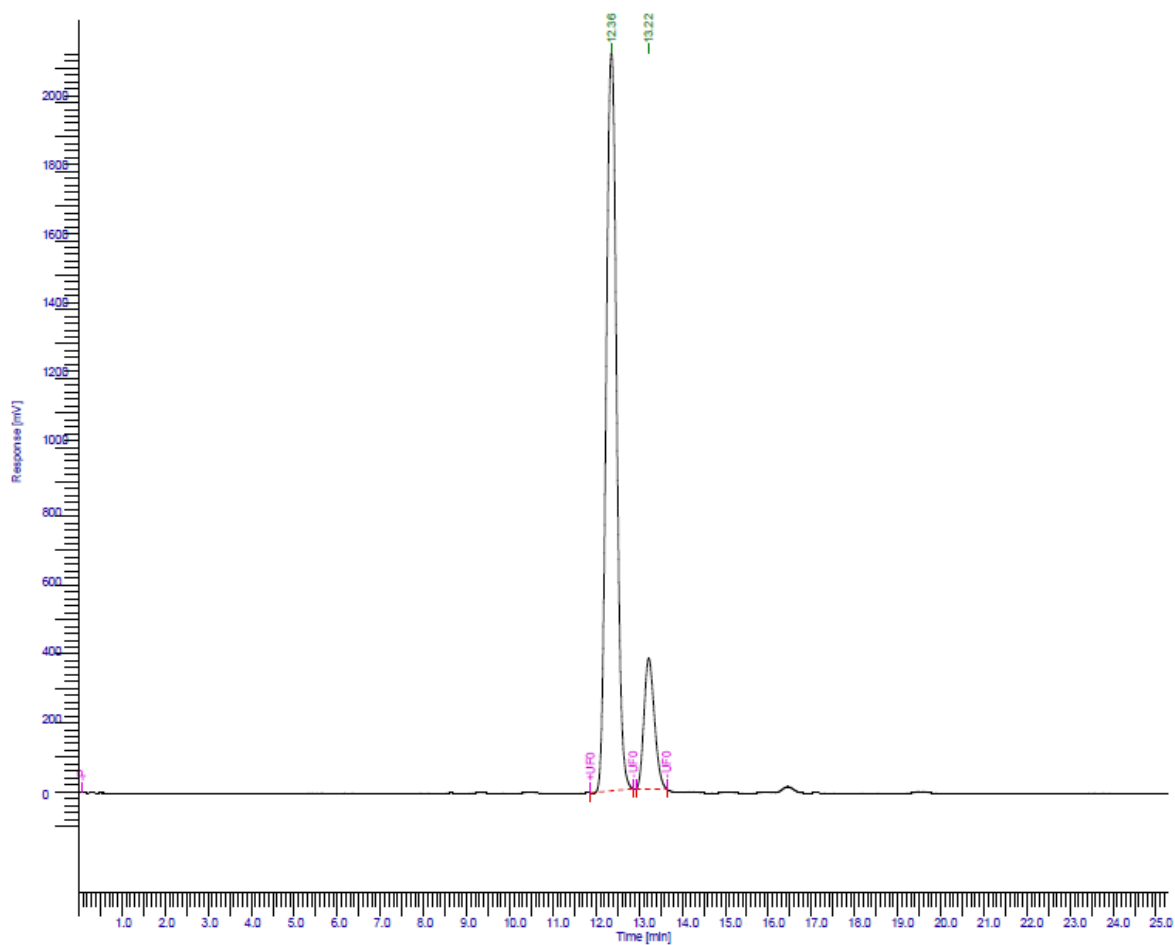

| Peak # | Time [min] | Area [ $\mu\text{V}\cdot\text{s}$ ] | Height [ $\mu\text{V}$ ] | Area [%] | Norm. Area [%] | BL  | Area/Height [s] |
|--------|------------|-------------------------------------|--------------------------|----------|----------------|-----|-----------------|
| 1      | 12.357     | 35848178.10                         | 2.14e+06                 | 84.88    | 84.88          | *MM | 16.7360         |
| 2      | 13.222     | 6386681.32                          | 378761.45                | 15.12    | 15.12          | *MM | 16.8620         |
|        |            | 42234859.42                         | 2.52e+06                 | 100.00   | 100.00         |     |                 |

AI-13-88

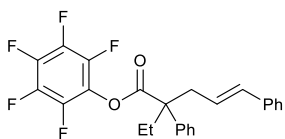

**3j**  
**<sup>1</sup>H NMR**

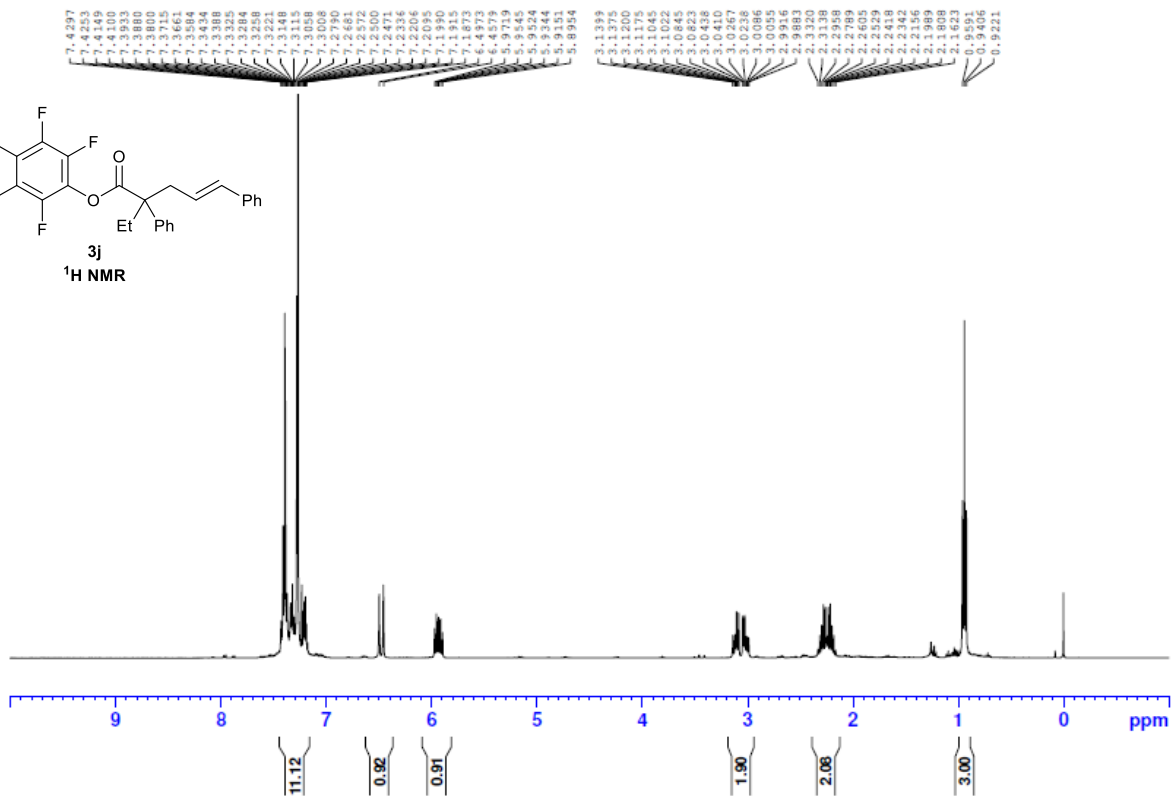

AI-13-88 13C

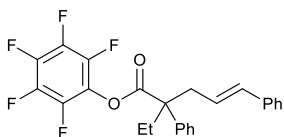

**3j**  
**<sup>13</sup>C NMR**

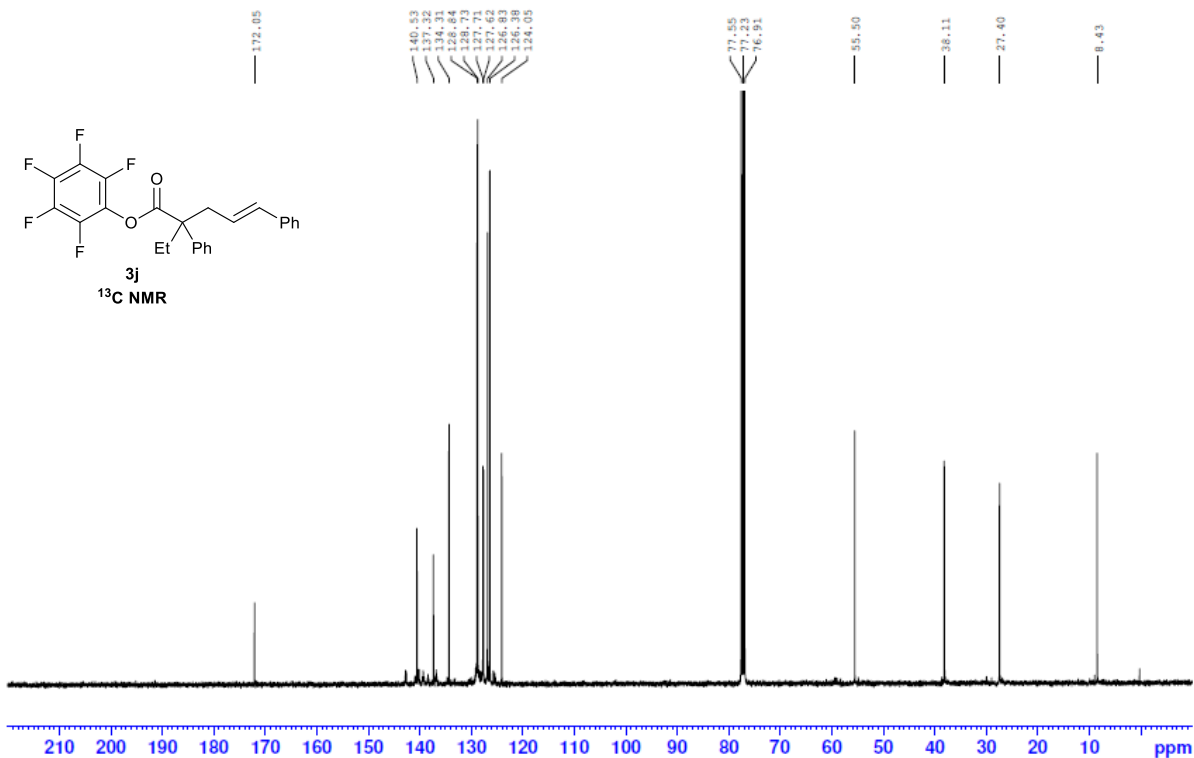



HPLC of (±)-3k:

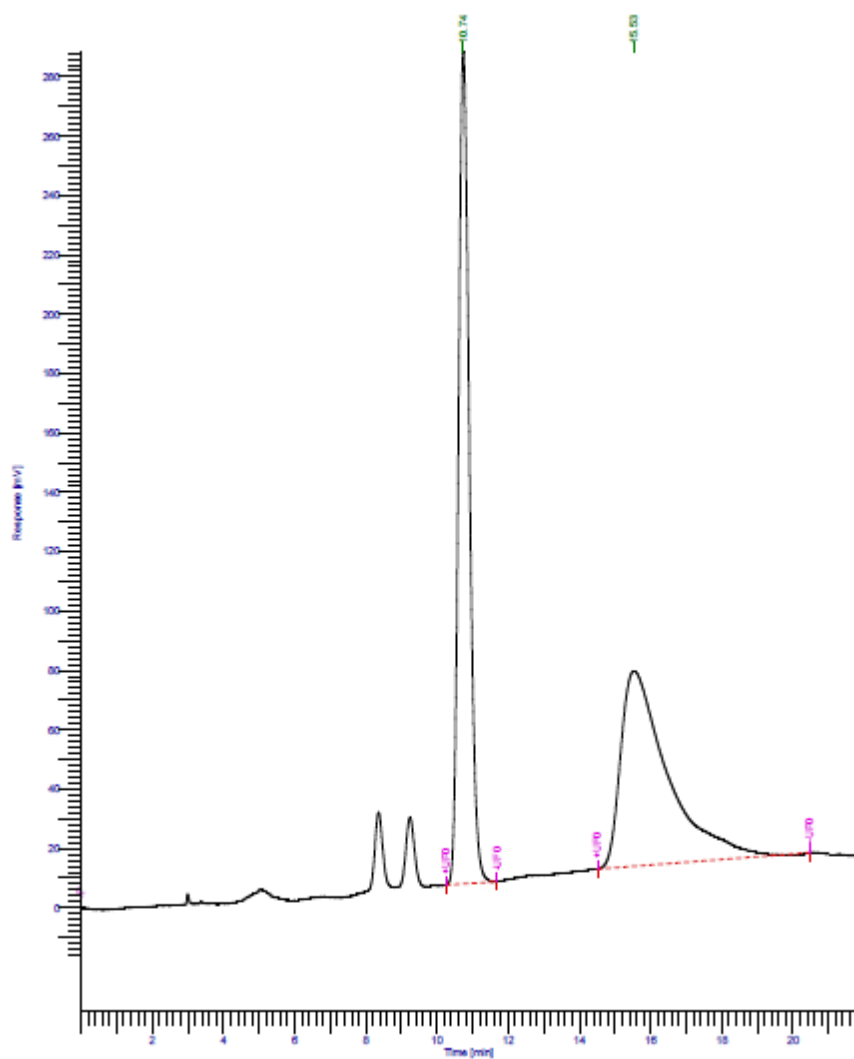

| Peak # | Time [min] | Area [µV·s] | Height [µV] | Area [%] | Norm. Area [%] | BL  | Area/Height [s] |
|--------|------------|-------------|-------------|----------|----------------|-----|-----------------|
| 1      | 10.736     | 5907024.01  | 280495.13   | 49.48    | 49.48          | *MM | 21.0593         |
| 2      | 15.532     | 6030561.63  | 65766.43    | 50.52    | 50.52          | *MM | 91.6967         |
|        |            | 11937585.64 | 346261.56   | 100.00   | 100.00         |     |                 |

HPLC of (-)-3k:

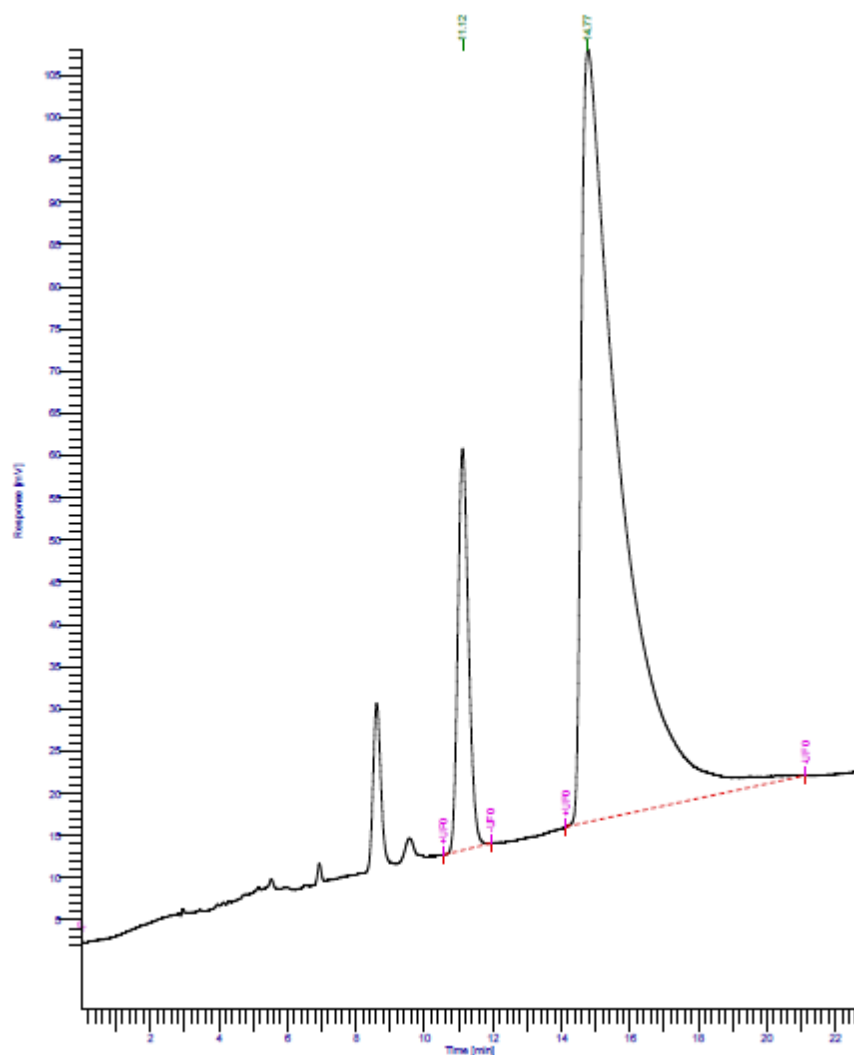

| Peak # | Time [min] | Area [µV·s] | Height [µV] | Area [%] | Norm. Area [%] | BL  | Area/Height [s] |
|--------|------------|-------------|-------------|----------|----------------|-----|-----------------|
| 1      | 11.117     | 1029251.44  | 47522.94    | 12.45    | 12.45          | *MM | 21.6580         |
| 2      | 14.769     | 7240381.33  | 91500.84    | 87.55    | 87.55          | *MM | 79.1291         |
|        |            | 8269632.76  | 139023.78   | 100.00   | 100.00         |     |                 |

AI-14-15

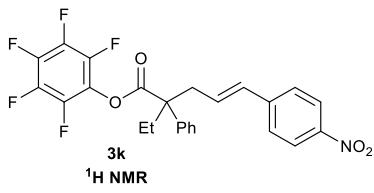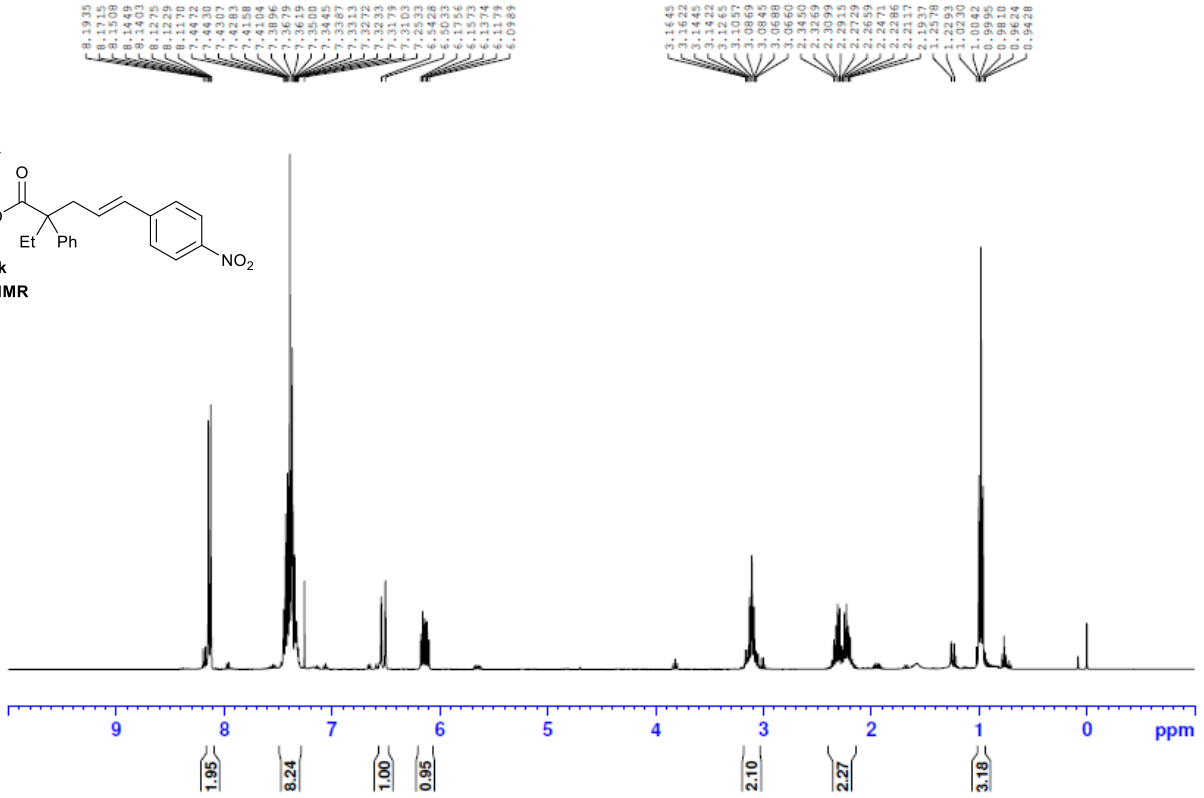

AI-14-15 13C

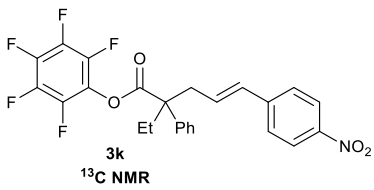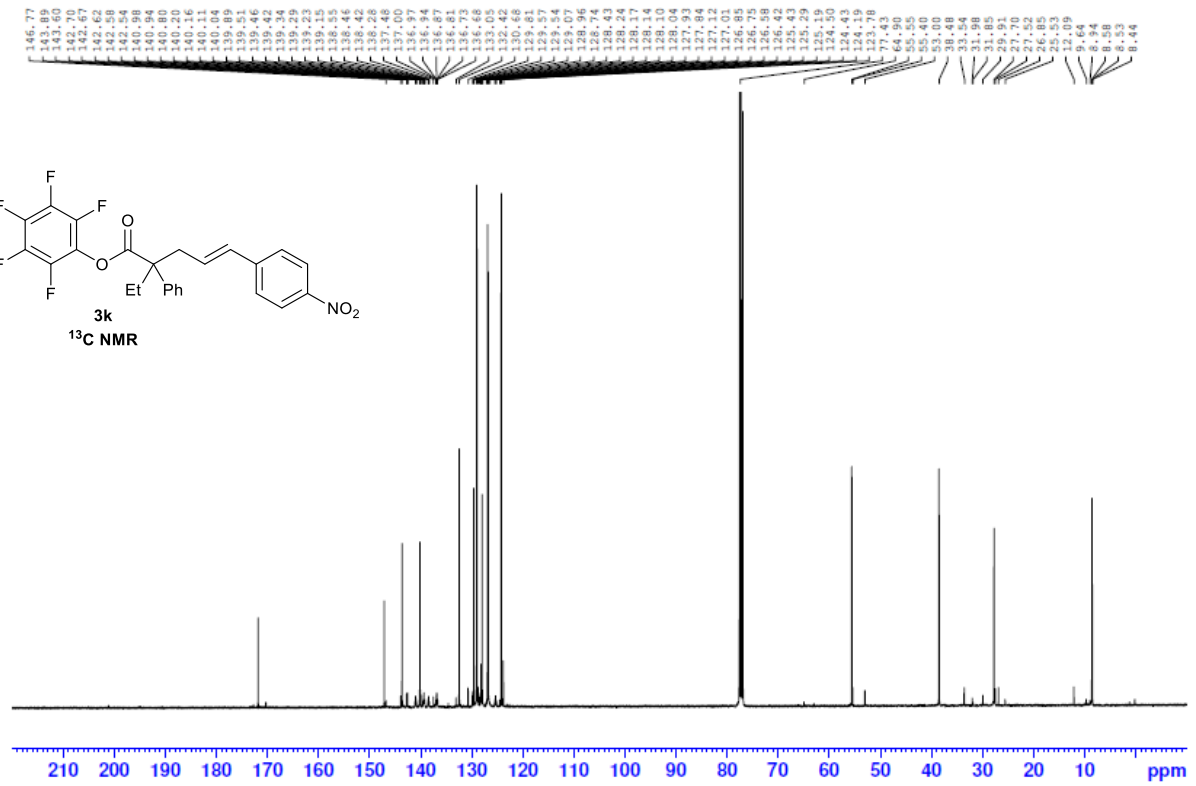

GC trace of amide derivative of ( $\pm$ )-**3I** (prepared from (*S*)- $\alpha$ -methylbenzylamine):

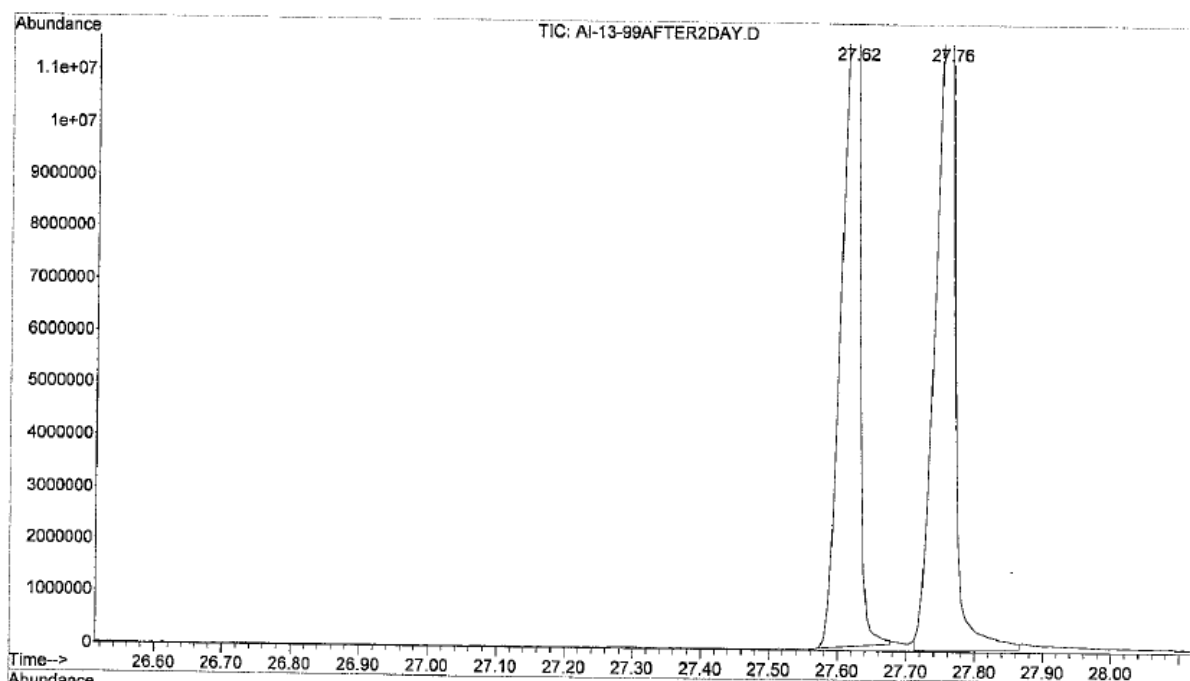

| peak # | R.T. min | first scan | max scan | last scan | PK TY | peak height | corr. area | corr. % max. | % of total |
|--------|----------|------------|----------|-----------|-------|-------------|------------|--------------|------------|
| 1      | 27.620   | 3759       | 3767     | 3782      | rM    | 15281015    | 26109439   | 97.36%       | 49.331%    |
| 2      | 27.757   | 3783       | 3791     | 3810      | rM    | 14194216    | 26817656   | 100.00%      | 50.669%    |

GC-MS trace of amide derivative of ( $-$ )-**3I** (prepared from (*S*)- $\alpha$ -methylbenzylamine):

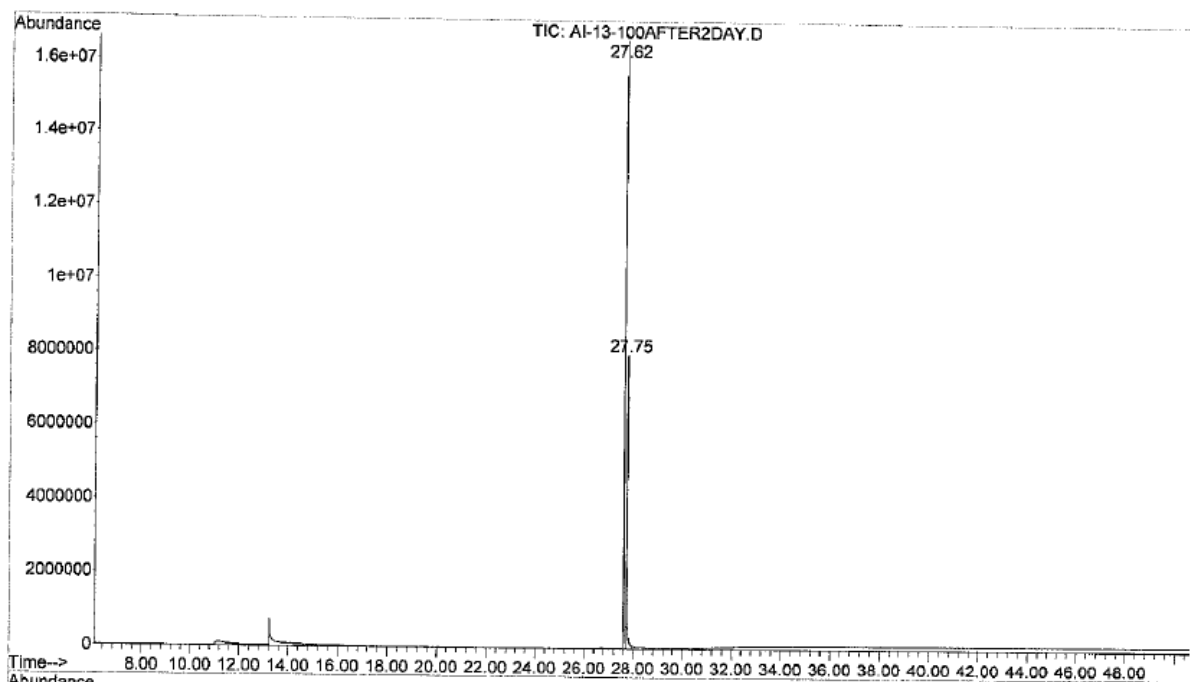

| peak # | R.T. min | first scan | max scan | last scan | PK TY | peak height | corr. area | corr. % max. | % of total |
|--------|----------|------------|----------|-----------|-------|-------------|------------|--------------|------------|
| 1      | 27.623   | 3758       | 3768     | 3782      | rM    | 16581250    | 30662709   | 100.00%      | 66.812%    |
| 2      | 27.749   | 3782       | 3790     | 3822      | rM    | 7960735     | 15231306   | 49.67%       | 33.188%    |

AI-13-89

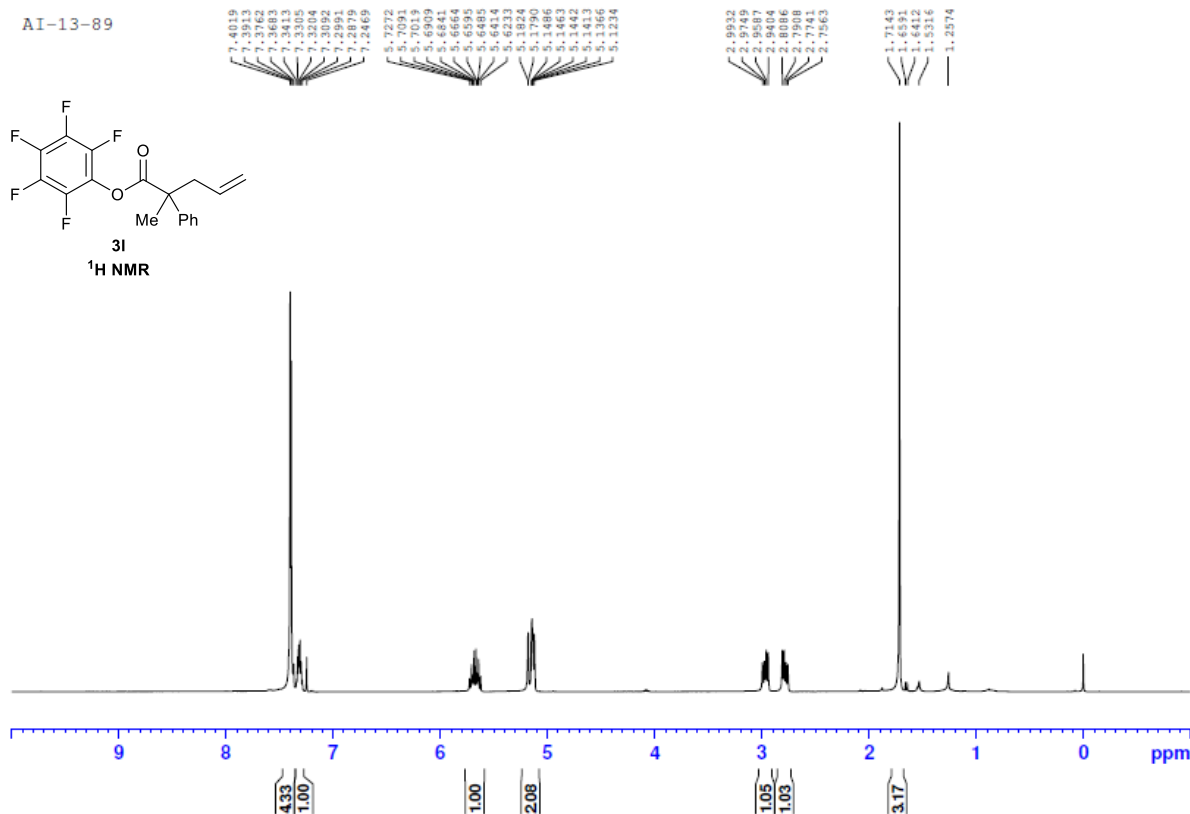

AI-13-89 13C

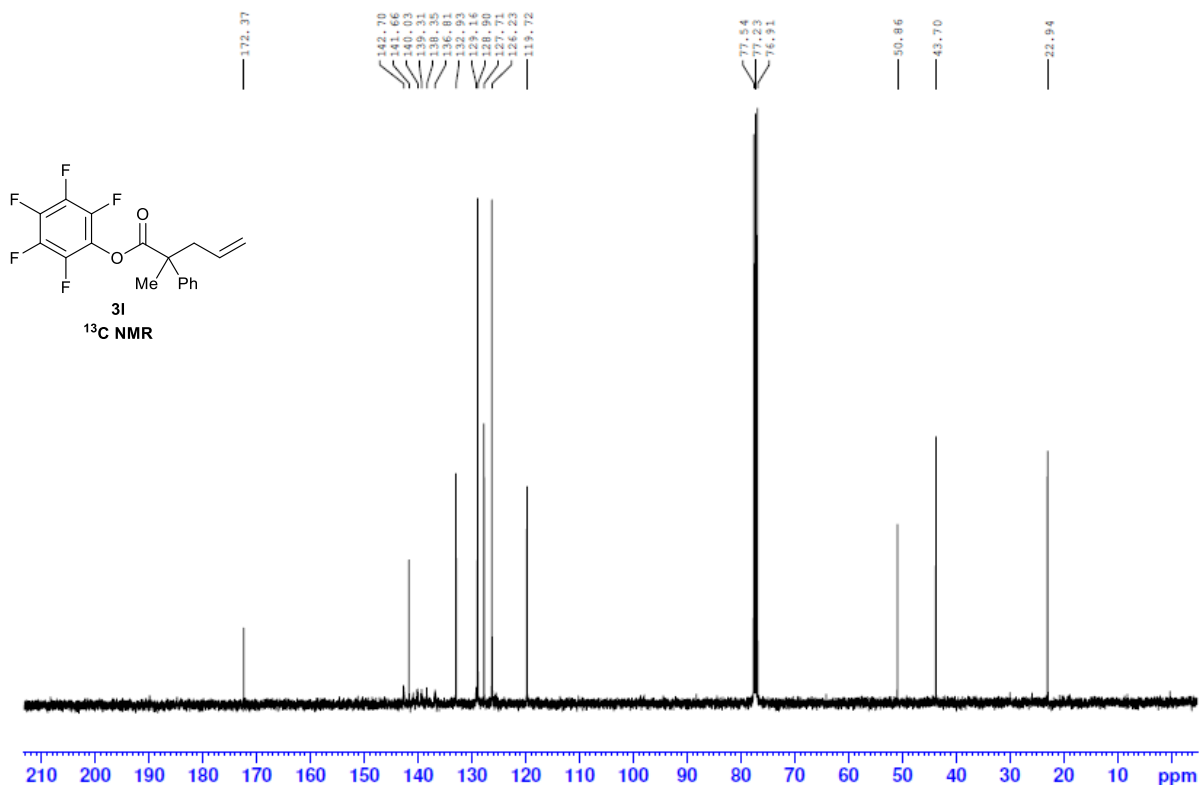

HPLC of (±)-3m:

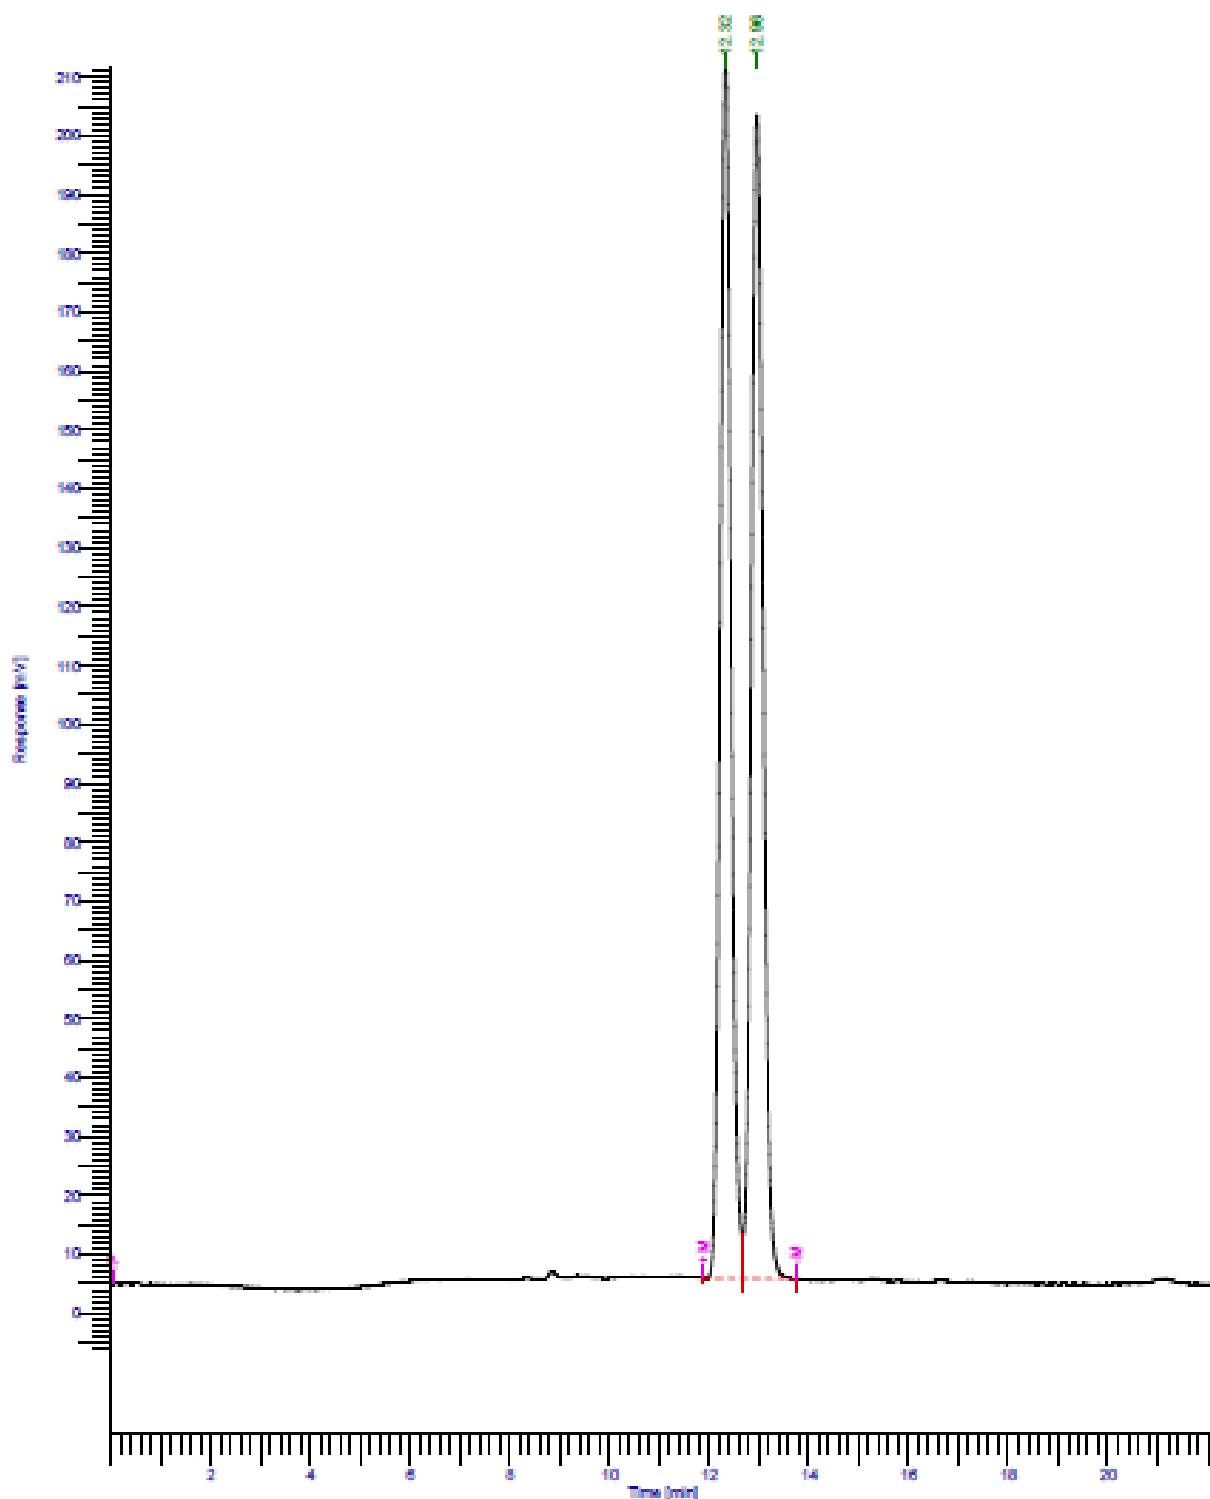

| Peak # | Time [min] | Area [µV·s] | Height [µV] | Area [%] | Norm. Area [%] | BL  | Area/Height [s] |
|--------|------------|-------------|-------------|----------|----------------|-----|-----------------|
| 1      | 12.323     | 3127200.80  | 205806.64   | 49.57    | 49.57          | *BV | 15.1948         |
| 2      | 12.959     | 3181137.04  | 197572.39   | 50.43    | 50.43          | *VB | 16.1011         |
|        |            | 6308337.84  | 403379.03   | 100.00   | 100.00         |     |                 |

HPLC of (+)-3m:

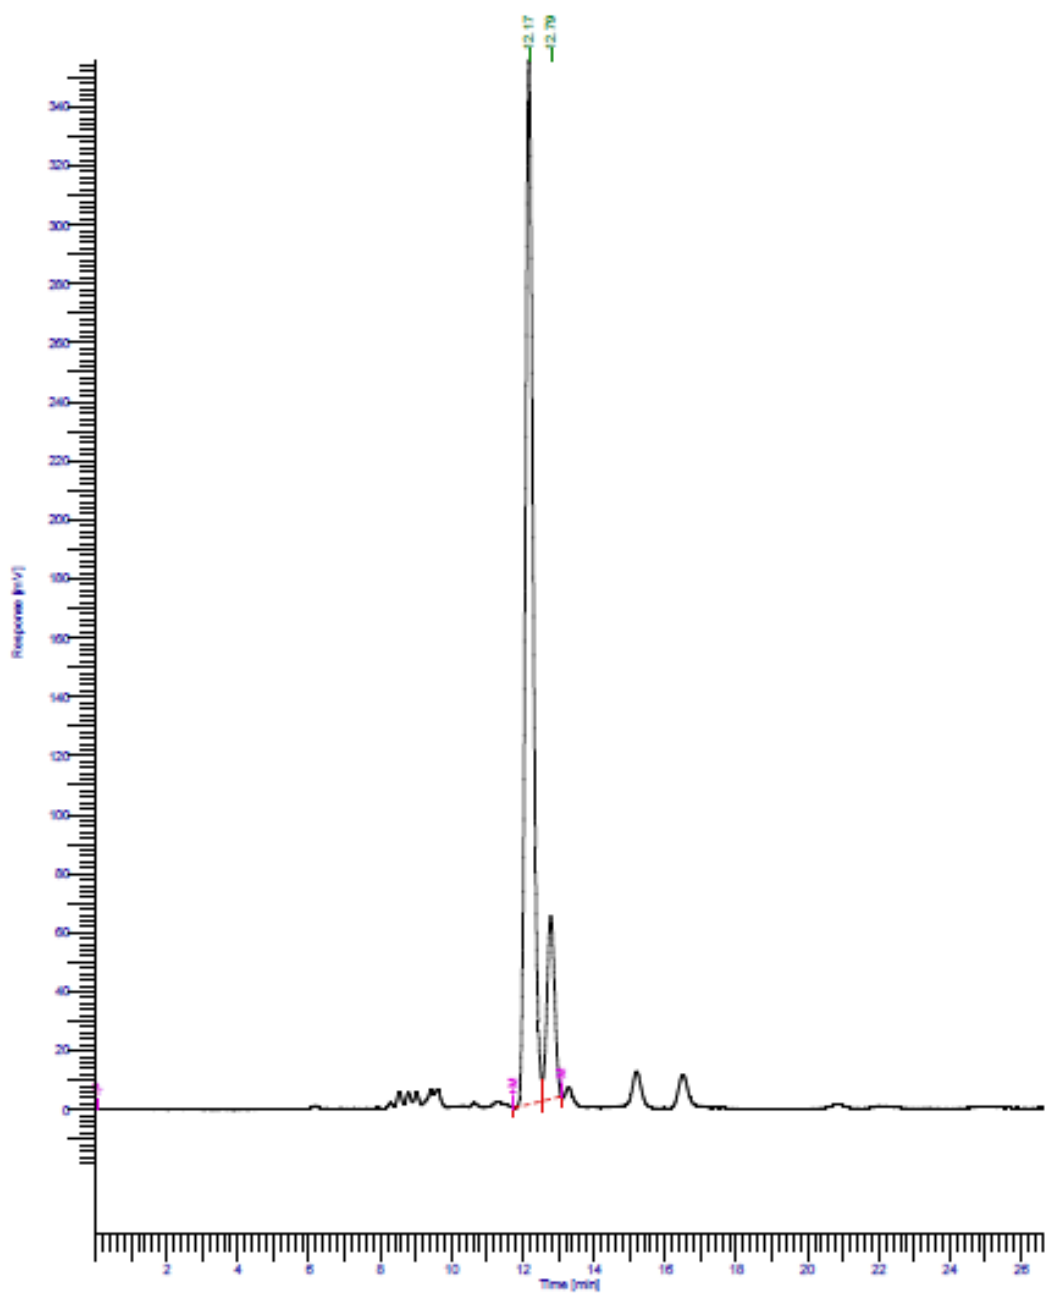

| Peak # | Time [min] | Area [µV·s] | Height [µV] | Area [%] | Norm. Area [%] | BL  | Area/Height [s] |
|--------|------------|-------------|-------------|----------|----------------|-----|-----------------|
| 1      | 12.173     | 5355255.06  | 354070.50   | 85.09    | 85.09          | *BV | 15.1248         |
| 2      | 12.788     | 938265.71   | 62034.14    | 14.91    | 14.91          | *VB | 15.1250         |
|        |            | 6293520.77  | 416104.64   | 100.00   | 100.00         |     |                 |

AI-13-94

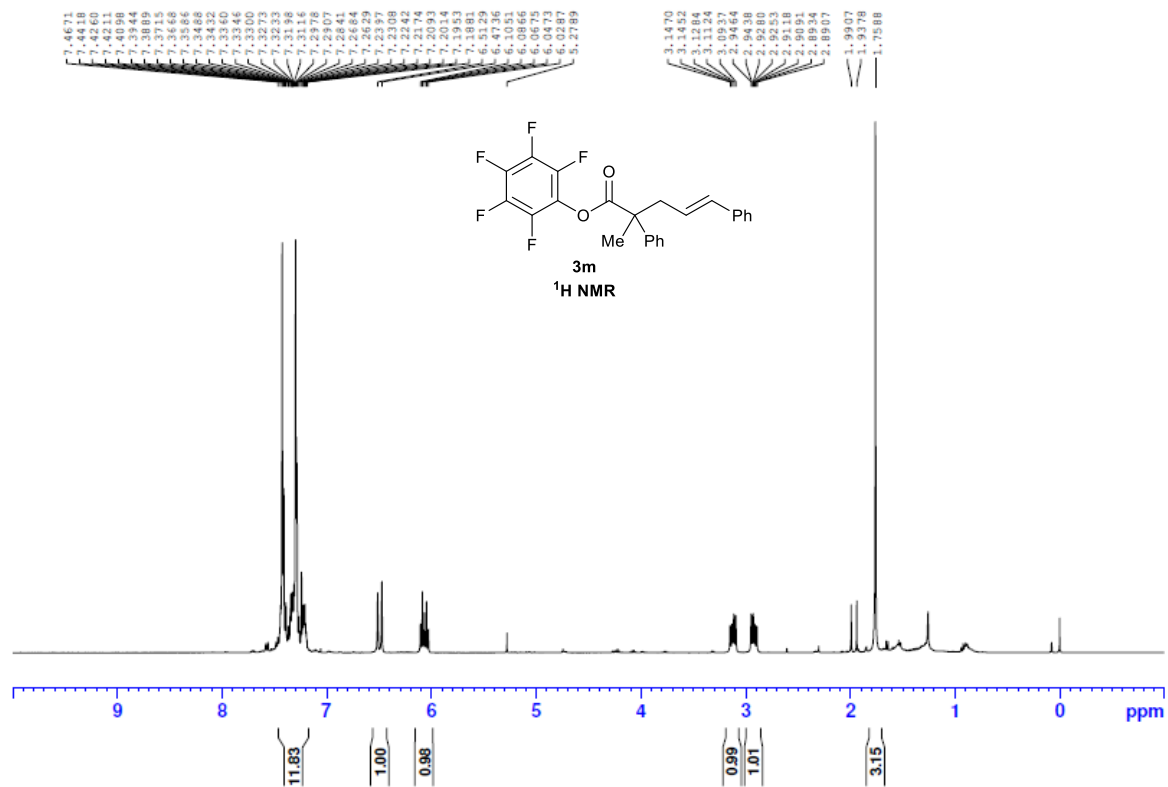

N123 AI13-94

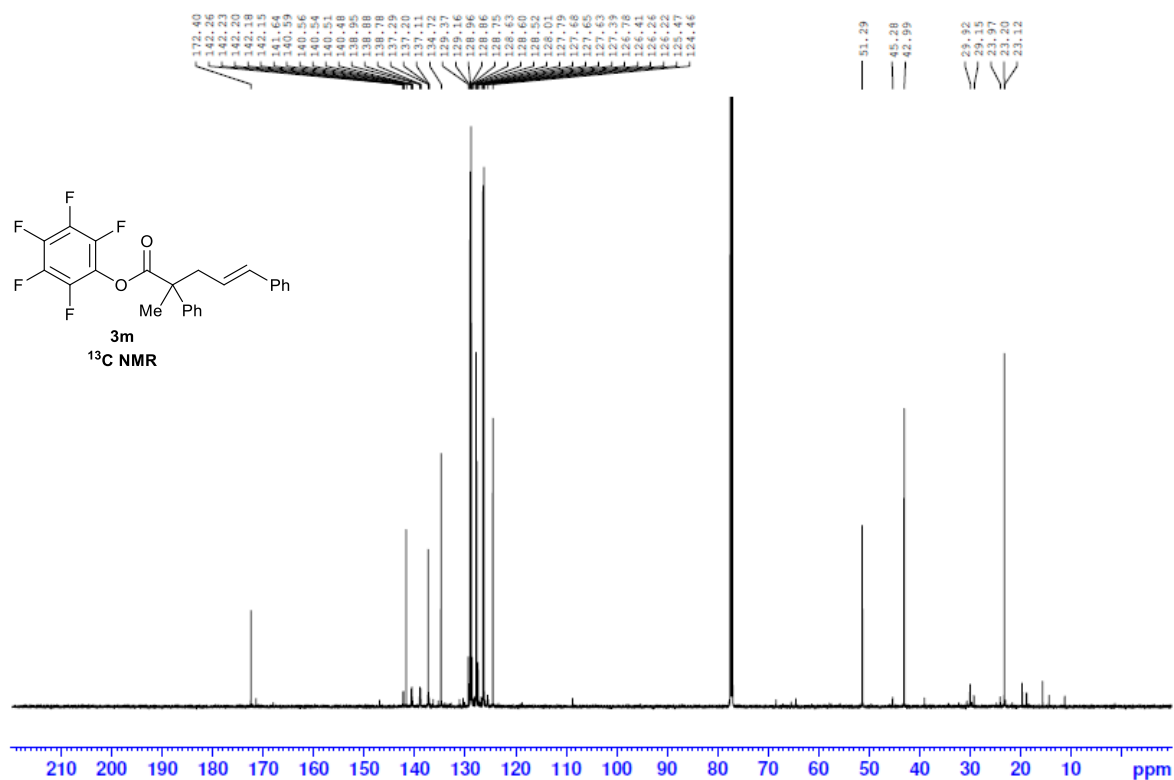



HPLC of (±)-3n:

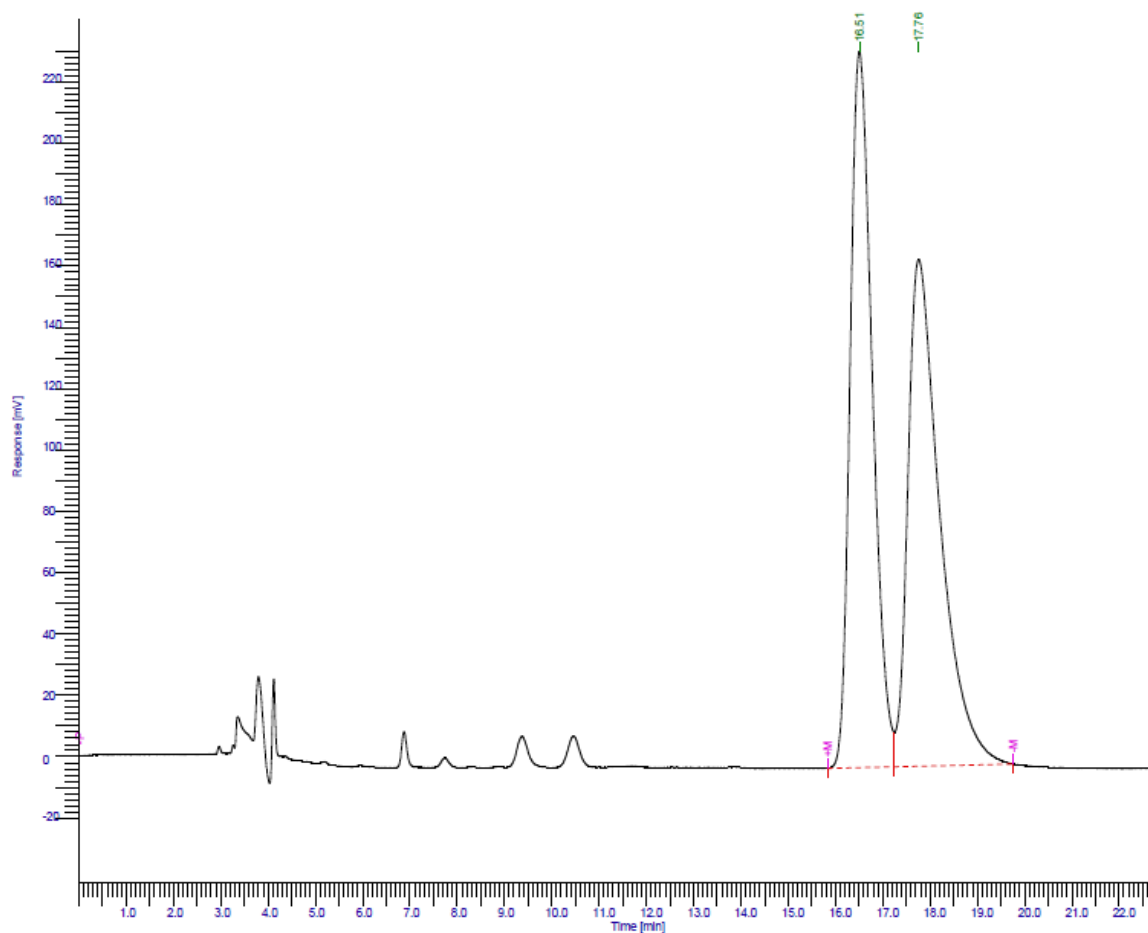

| Peak # | Time [min] | Area [µV·s] | Height [µV] | Area [%] | Norm. Area [%] | BL  | Area/Height [s] |
|--------|------------|-------------|-------------|----------|----------------|-----|-----------------|
| 1      | 16.506     | 7636857.91  | 233694.52   | 49.47    | 49.47          | *BV | 32.6788         |
| 2      | 17.760     | 7800626.79  | 165369.00   | 50.53    | 50.53          | *VB | 47.1710         |
|        |            | 15437484.70 | 399063.53   | 100.00   | 100.00         |     |                 |

HPLC of (+)-3n:

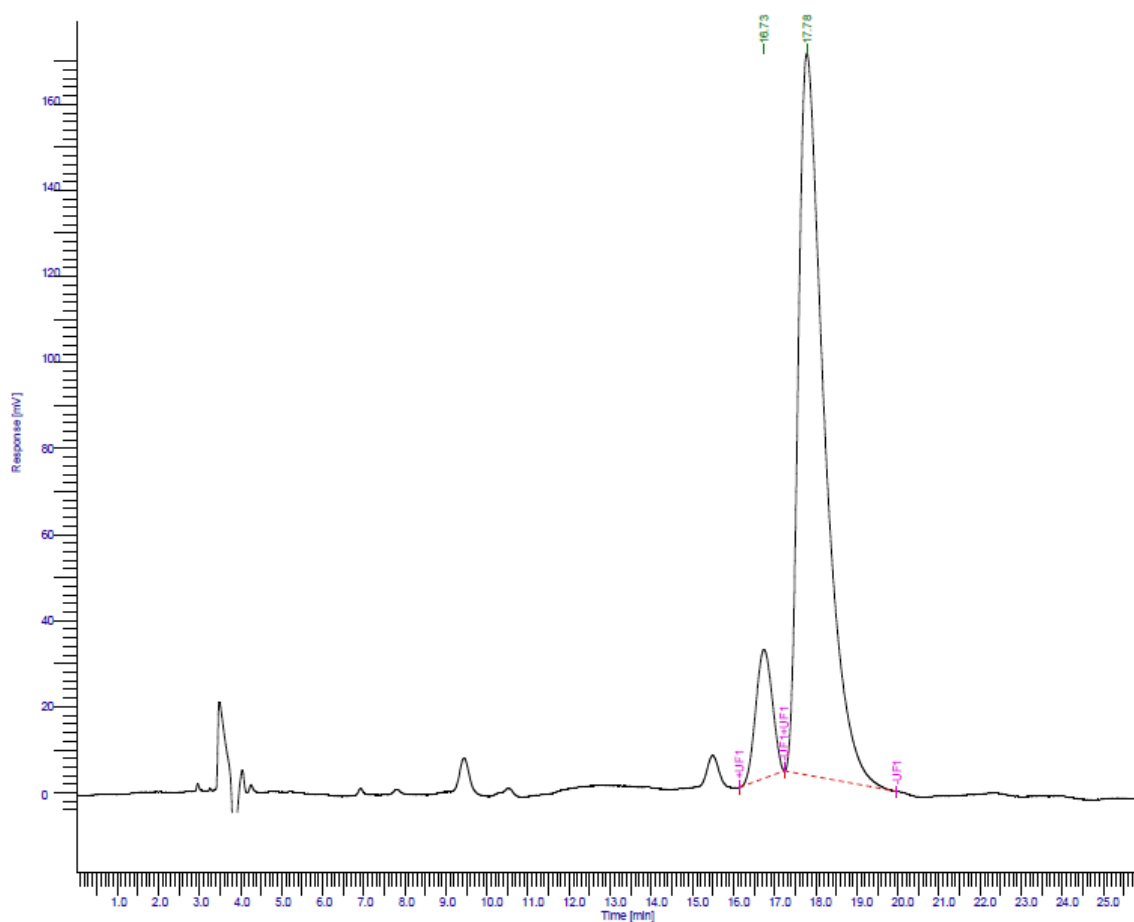

| Peak # | Time [min] | Area [ $\mu\text{V}\cdot\text{s}$ ] | Height [ $\mu\text{V}$ ] | Area [%] | Norm. Area [%] | BL  | Area/Height [s] |
|--------|------------|-------------------------------------|--------------------------|----------|----------------|-----|-----------------|
| 1      | 16.735     | 839160.41                           | 29970.34                 | 10.20    | 10.20          | *MM | 27.9997         |
| 2      | 17.783     | 7390619.41                          | 167798.52                | 89.80    | 89.80          | *MM | 44.0446         |
|        |            | 8229779.83                          | 197768.86                | 100.00   | 100.00         |     |                 |

AI-14-47

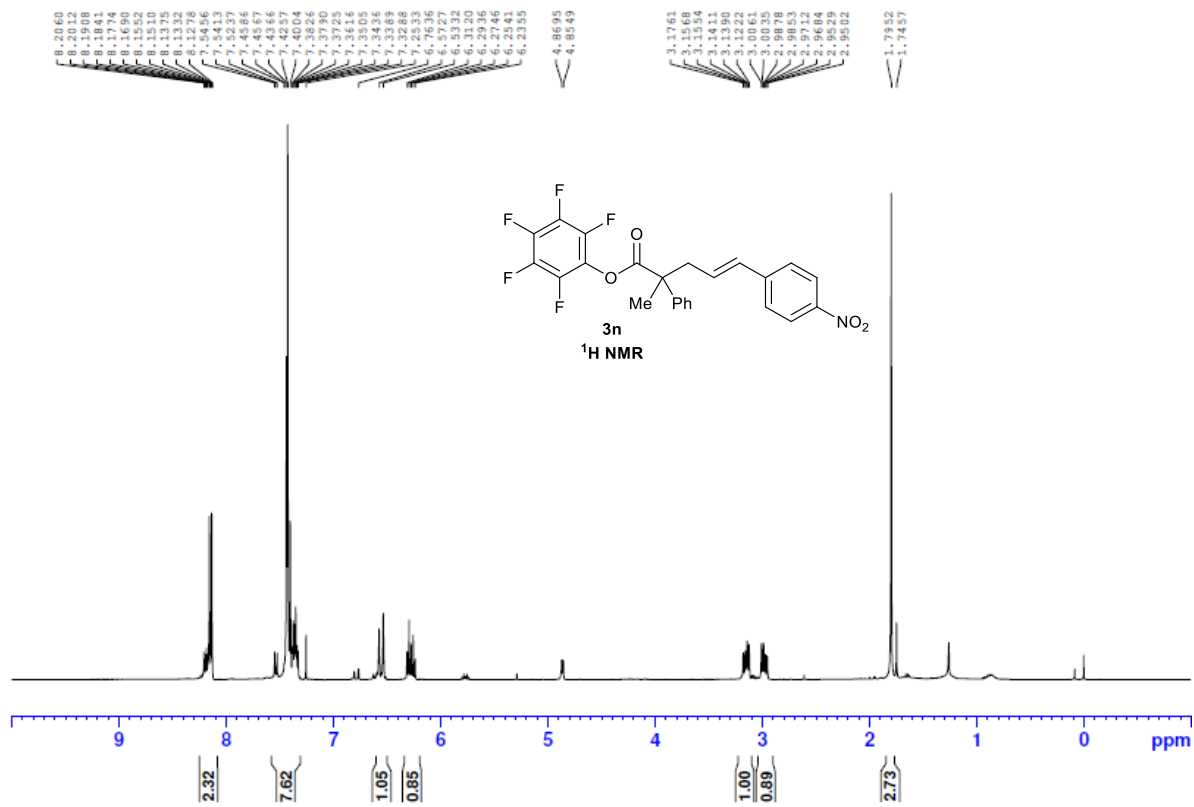

AI-14-47 13C

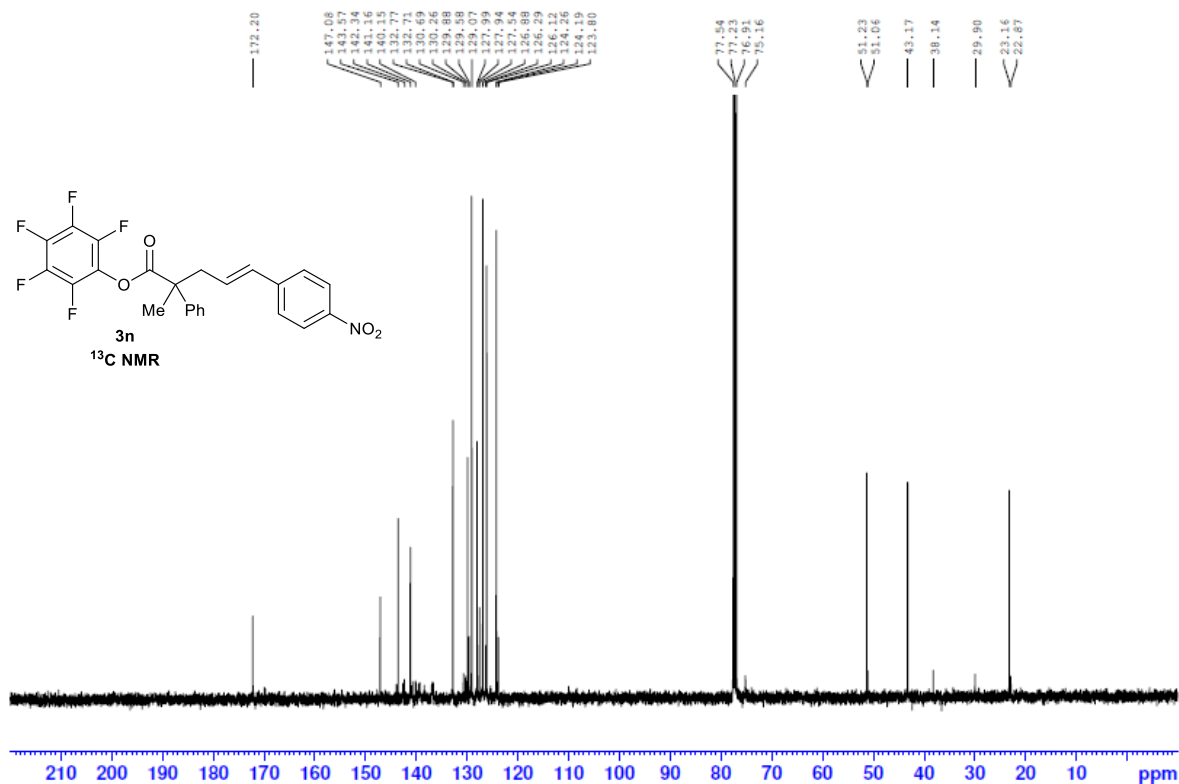

# HPLC of (±)-3p:

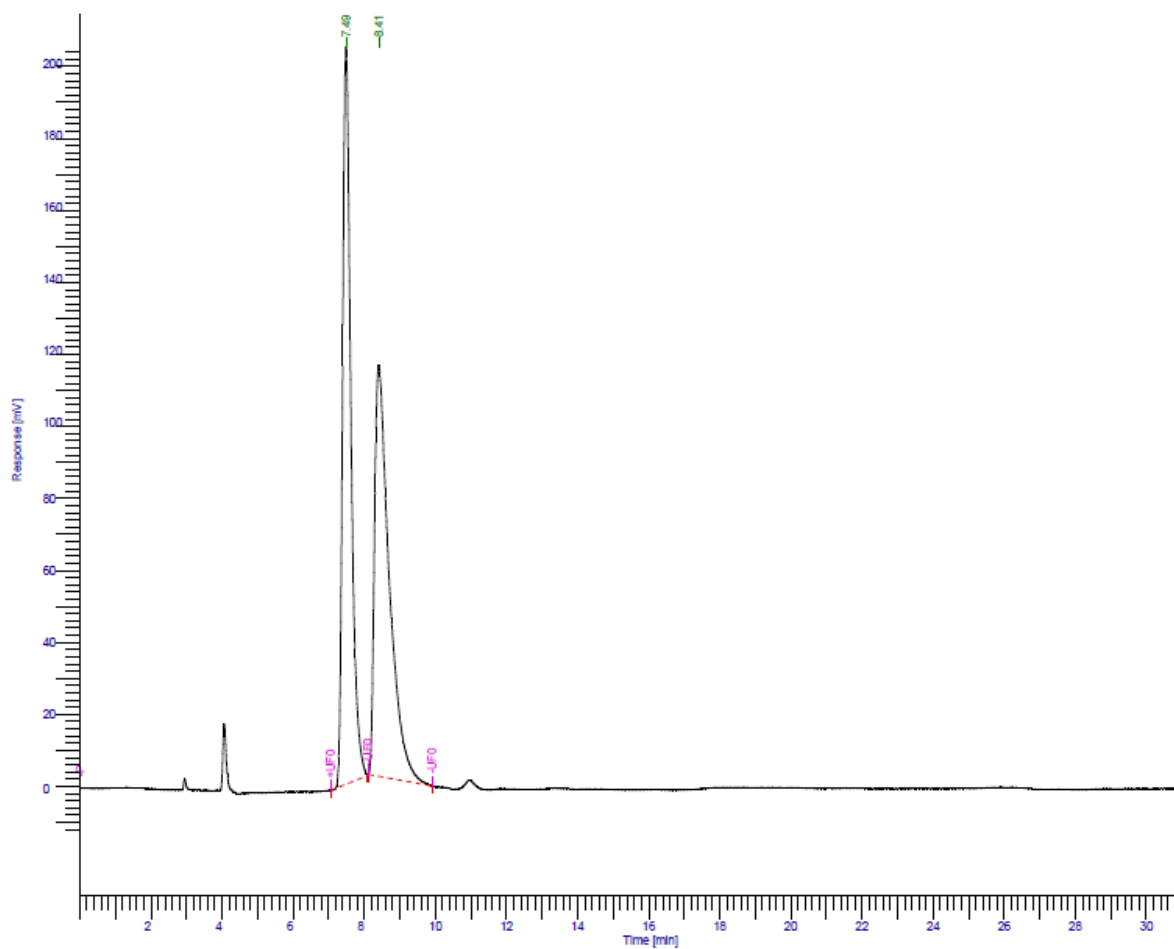

| Peak # | Time [min] | Area [ $\mu\text{V}\cdot\text{s}$ ] | Height [ $\mu\text{V}$ ] | Area [%] | Norm. Area [%] | BL  | Area/Height [s] |
|--------|------------|-------------------------------------|--------------------------|----------|----------------|-----|-----------------|
| 1      | 7.487      | 3312559.31                          | 204864.77                | 50.16    | 50.16          | *MM | 16.1695         |
| 2      | 8.411      | 3290998.37                          | 113966.89                | 49.84    | 49.84          | *MM | 28.8768         |
|        |            | 6603557.68                          | 318831.66                | 100.00   | 100.00         |     |                 |

HPLC of (+)-3p:

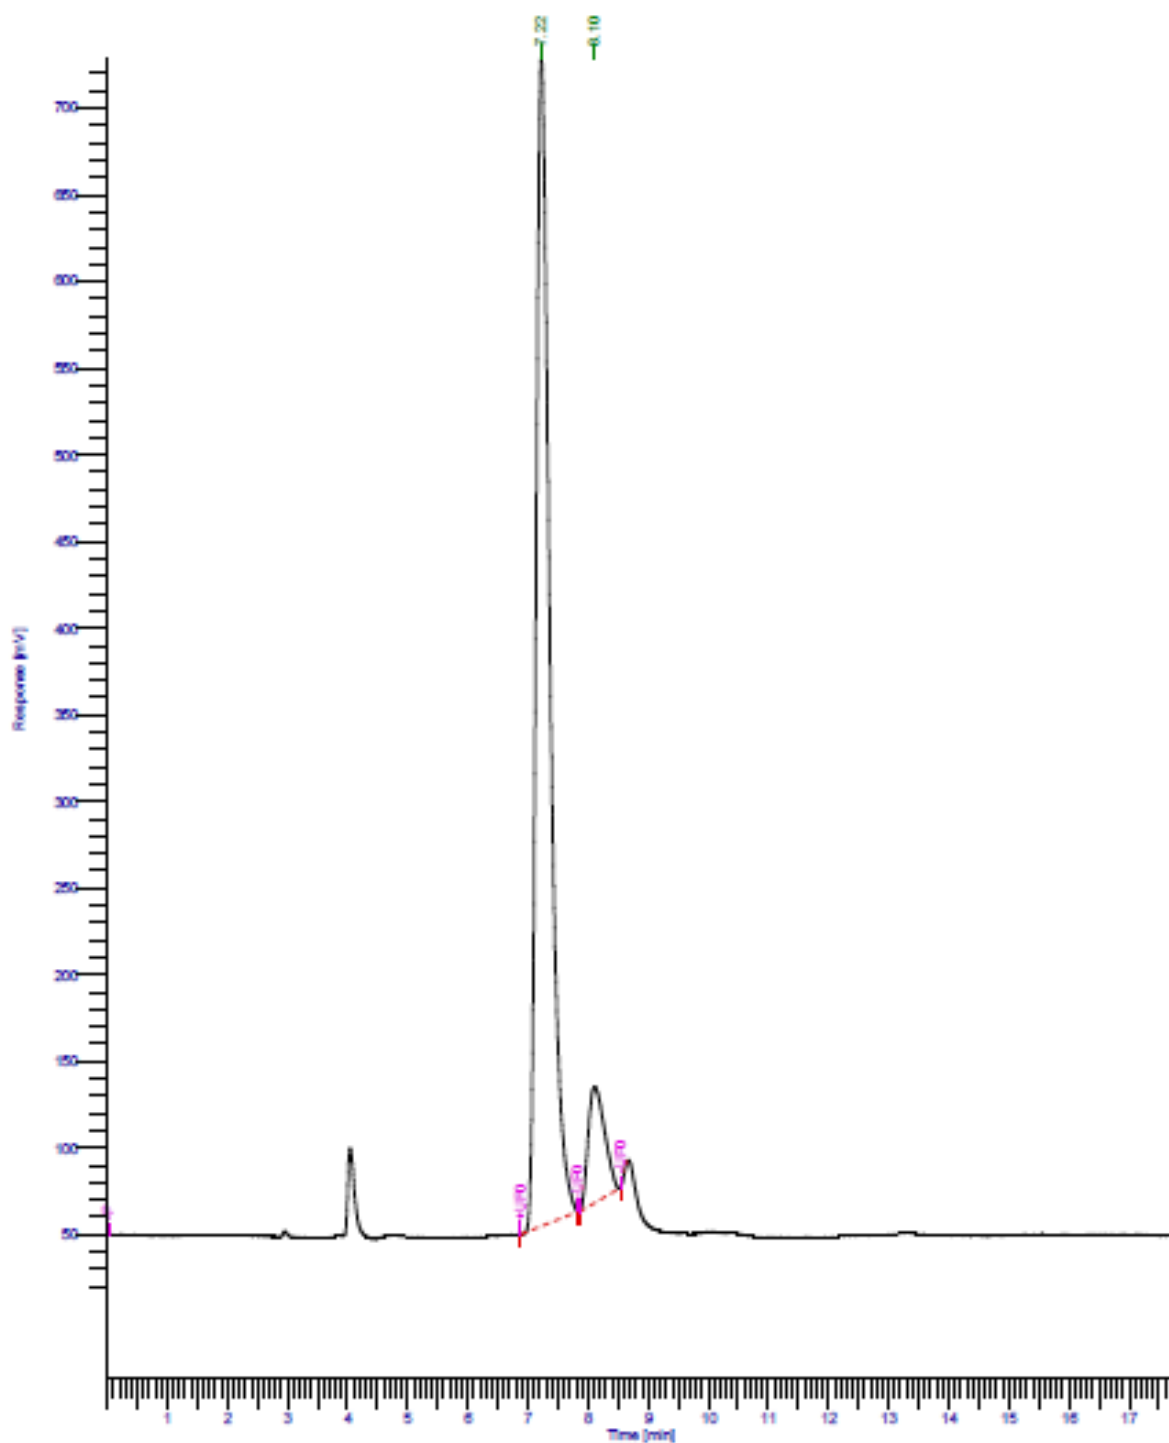

| Peak # | Time [min] | Area [µV·s] | Height [µV] | Area [%] | Norm. Area [%] | BL  | Area/Height [s] |
|--------|------------|-------------|-------------|----------|----------------|-----|-----------------|
| 1      | 7.223      | 10721234.21 | 674224.94   | 89.37    | 89.37          | *MM | 15.9016         |
| 2      | 8.103      | 1275780.71  | 67078.26    | 10.63    | 10.63          | *MM | 19.0193         |
|        |            | 11997014.93 | 741303.20   | 100.00   | 100.00         |     |                 |

AI-14-53

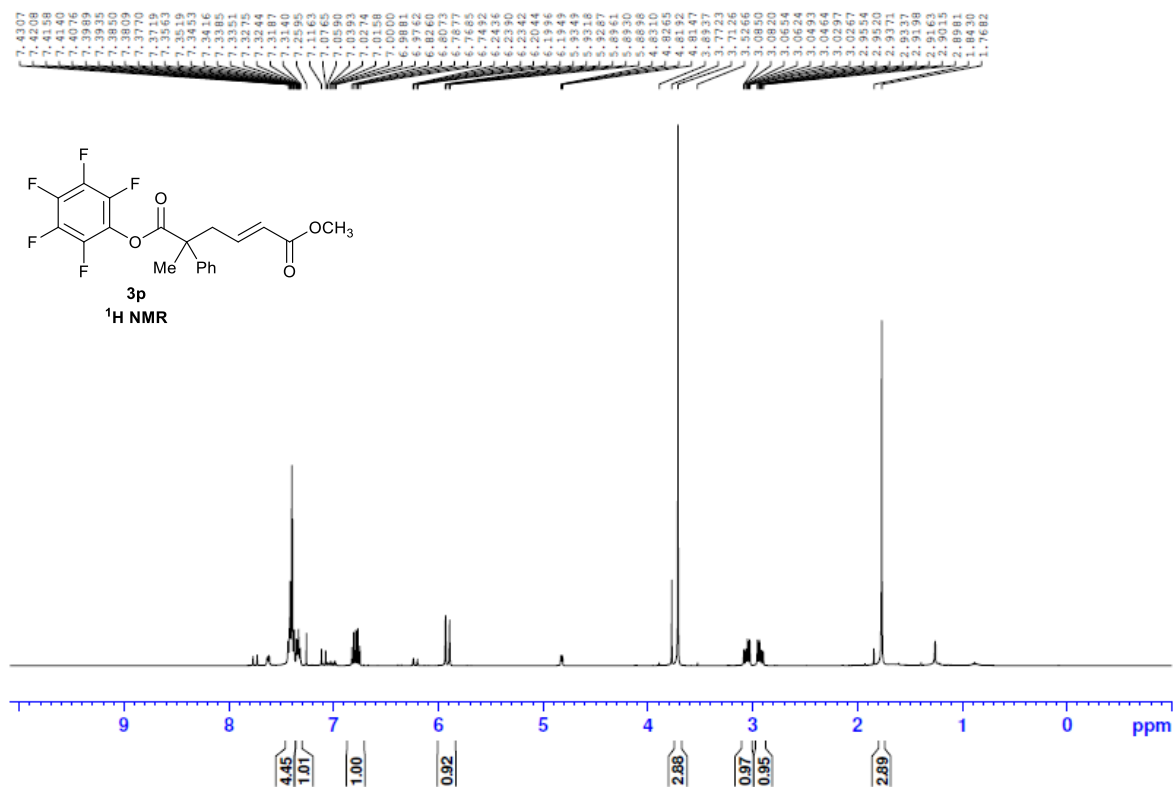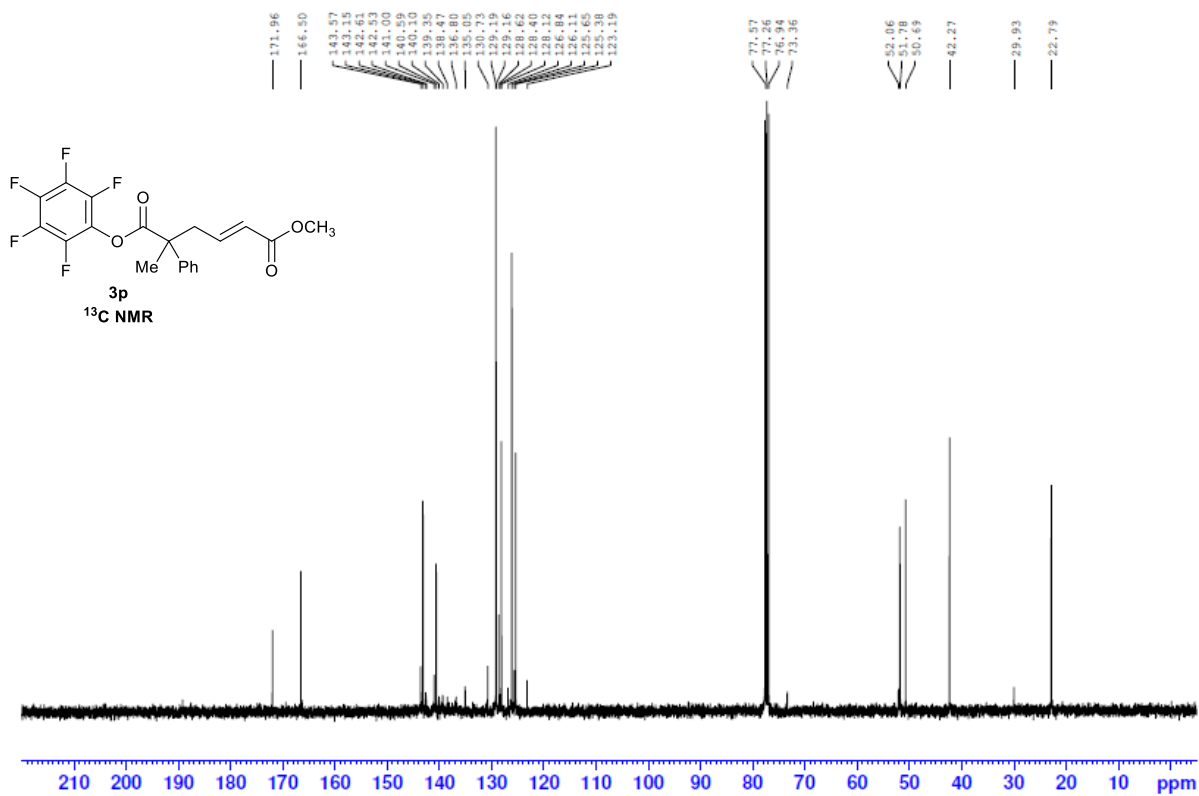

### HPLC of (±)-3q:

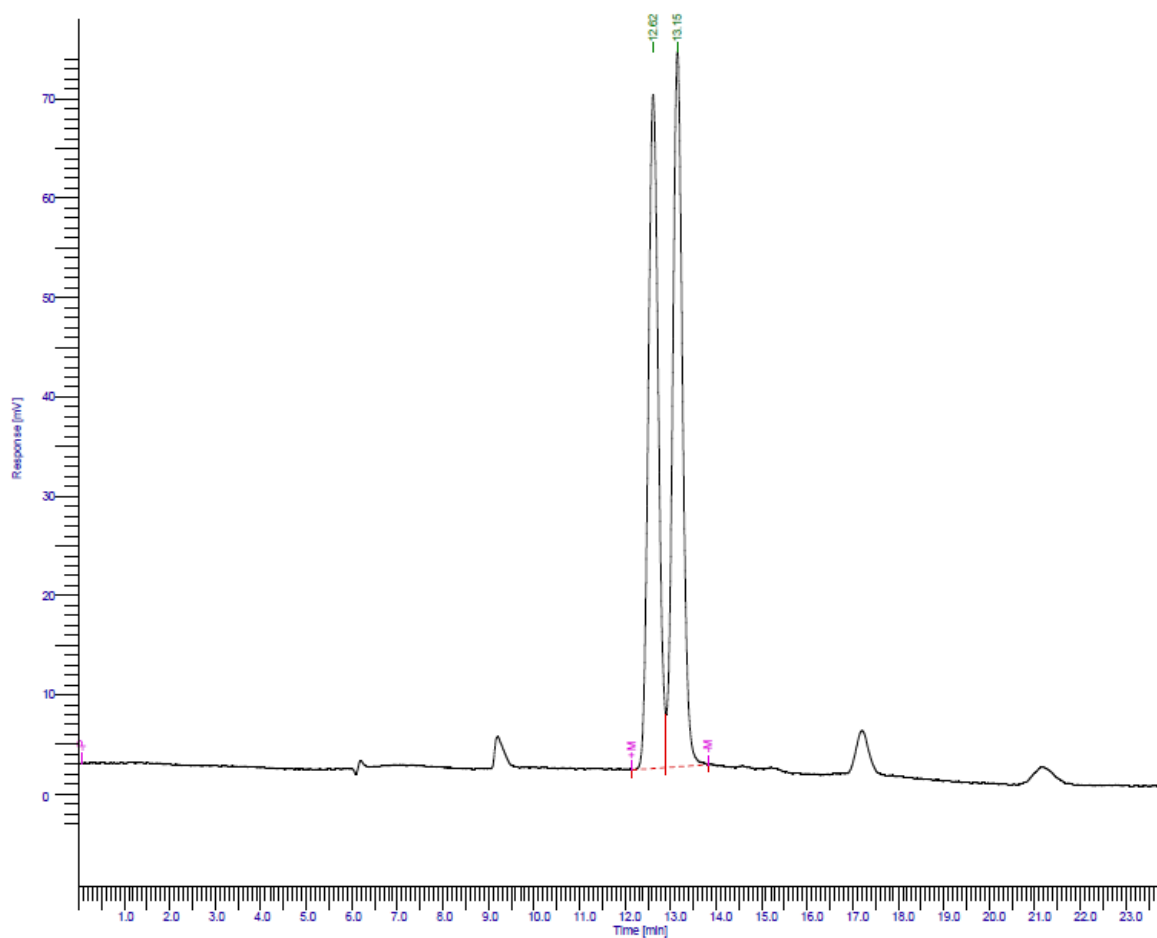

| Peak # | Time [min] | Area [ $\mu\text{V}\cdot\text{s}$ ] | Height [ $\mu\text{V}$ ] | Area [%] | Norm. Area [%] | BL  | Area/Height [s] |
|--------|------------|-------------------------------------|--------------------------|----------|----------------|-----|-----------------|
| 1      | 12.616     | 1047703.05                          | 67870.06                 | 49.06    | 49.06          | *BV | 15.4369         |
| 2      | 13.151     | 1087765.22                          | 72024.96                 | 50.94    | 50.94          | *VB | 15.1026         |
|        |            | 2135468.26                          | 139895.02                | 100.00   | 100.00         |     |                 |

# HPLC of (+)-3q:

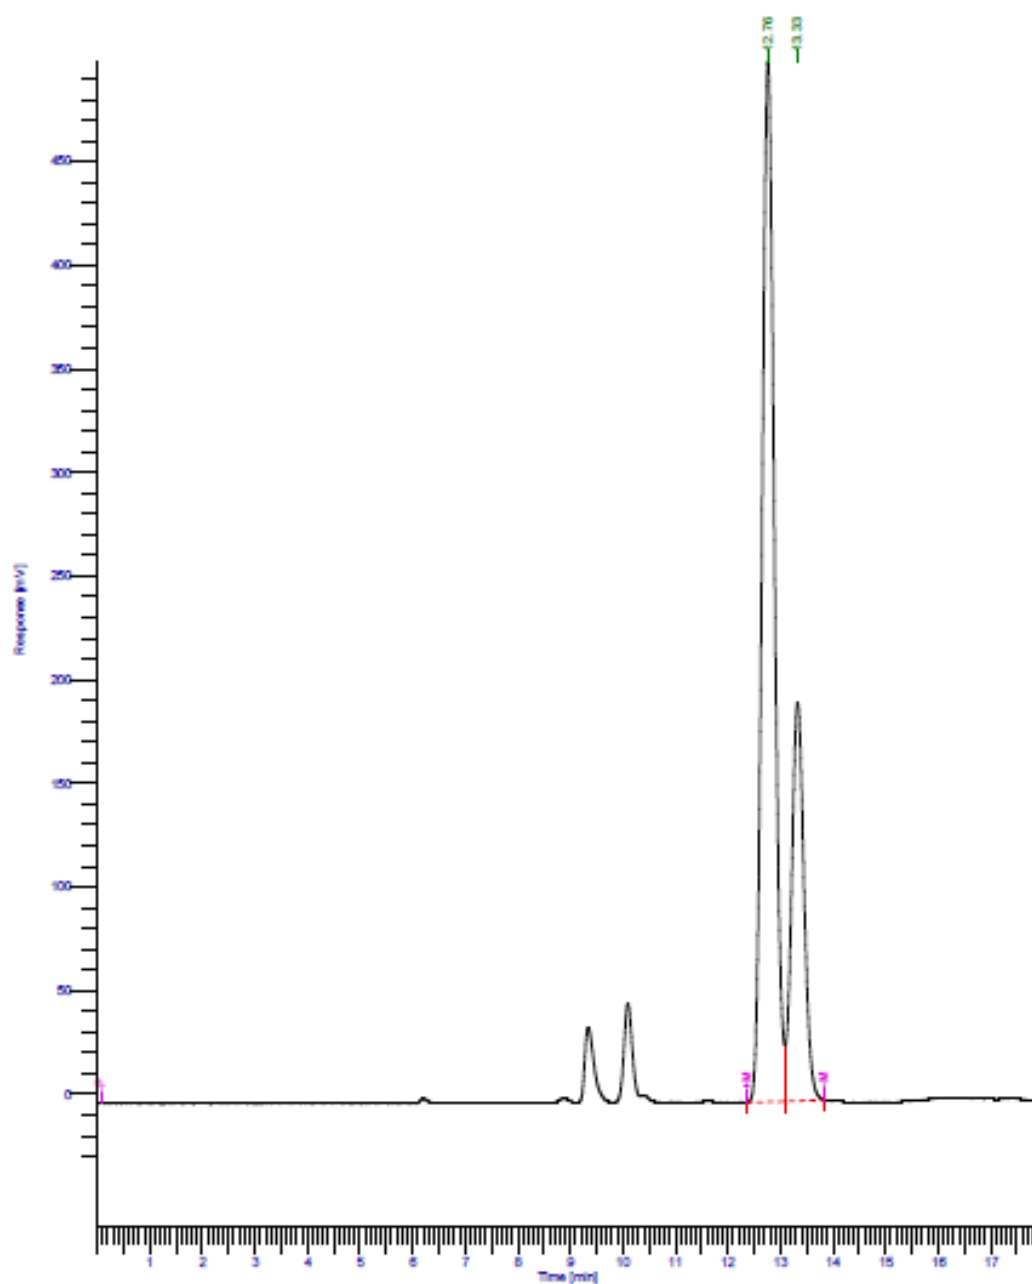

| Peak # | Time [min] | Area [µV·s] | Height [µV] | Area [%] | Norm. Area [%] | BL  | Area/Height [s] |
|--------|------------|-------------|-------------|----------|----------------|-----|-----------------|
| 1      | 12.761     | 8141396.14  | 502015.32   | 72.20    | 72.20          | *BV | 16.2174         |
| 2      | 13.325     | 3134919.55  | 191985.73   | 27.80    | 27.80          | *VB | 16.3289         |
|        |            | 11276315.69 | 694001.06   | 100.00   | 100.00         |     |                 |



AI-14-51

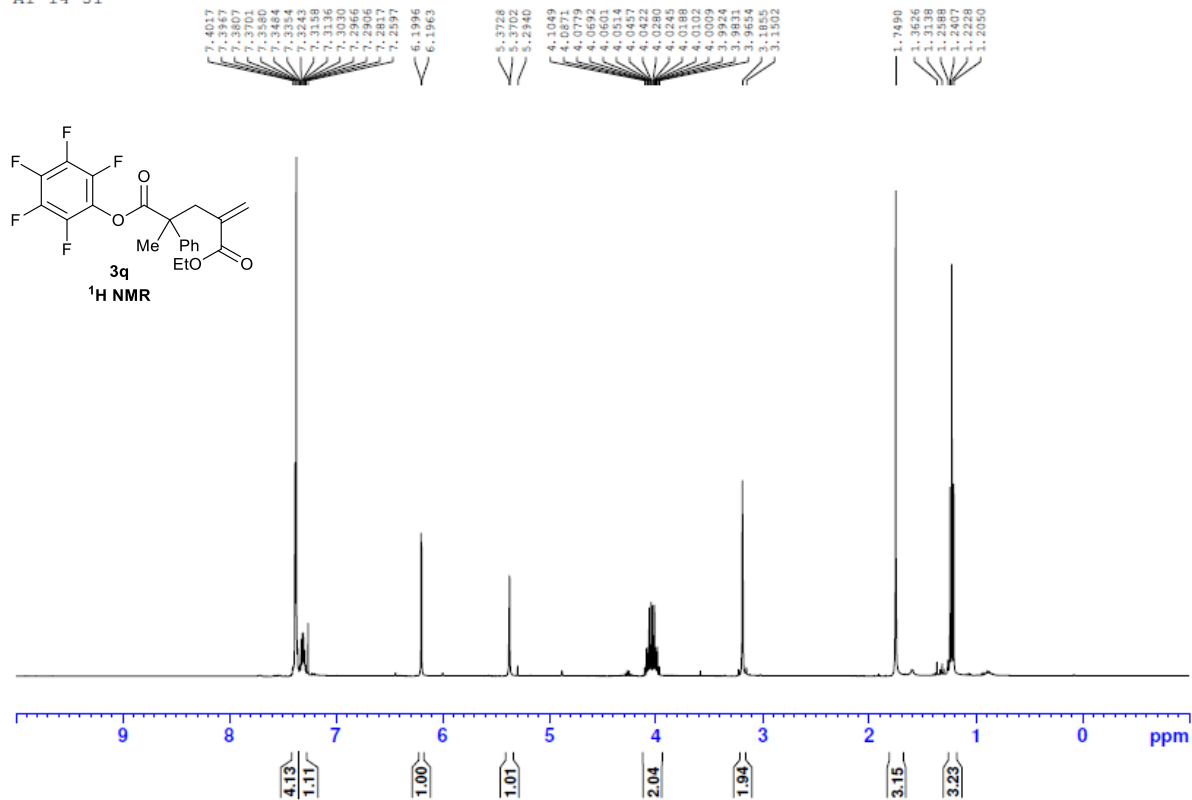

AI-14-51 13C

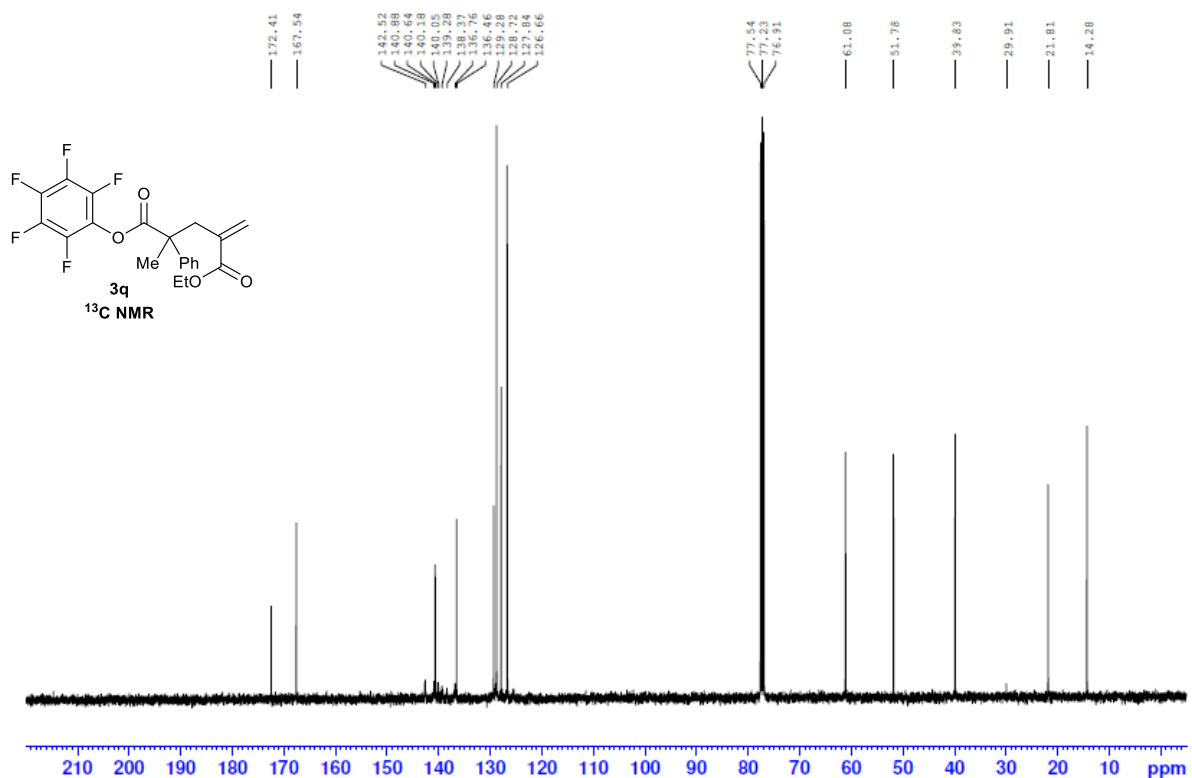

N123 AI13-97

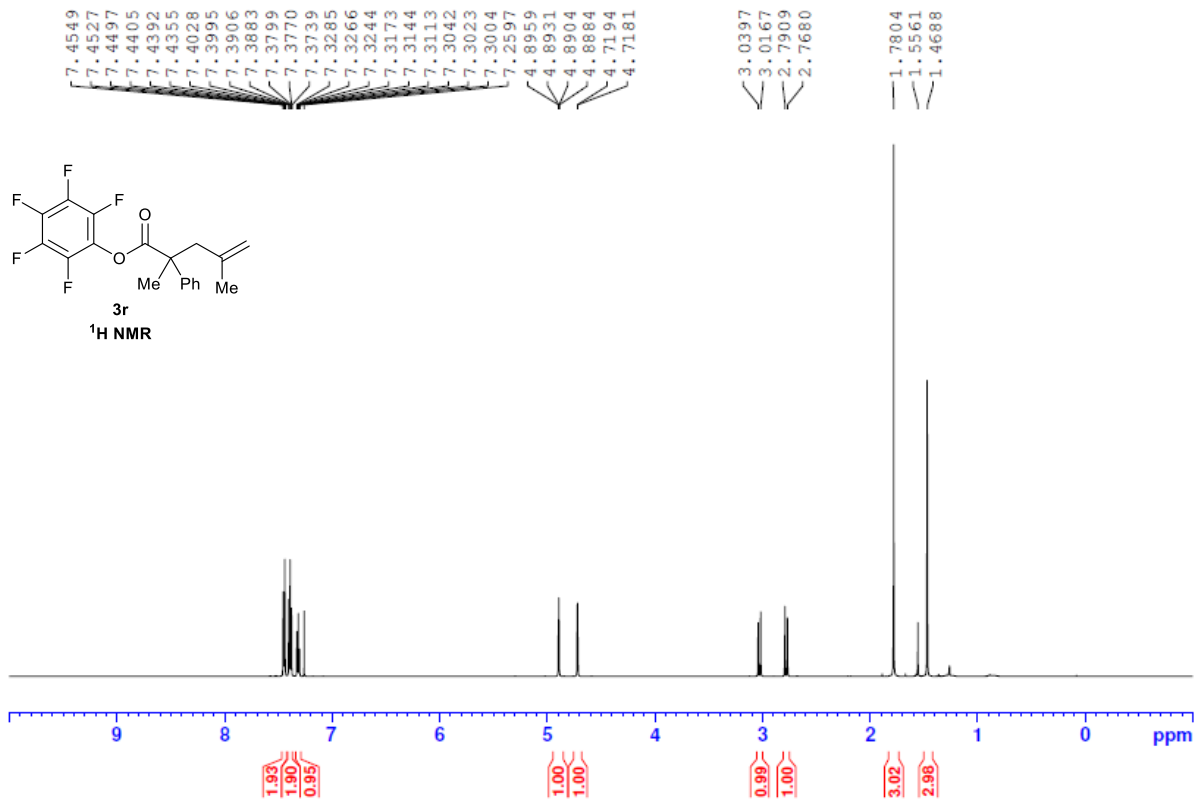

N123 AI13-97

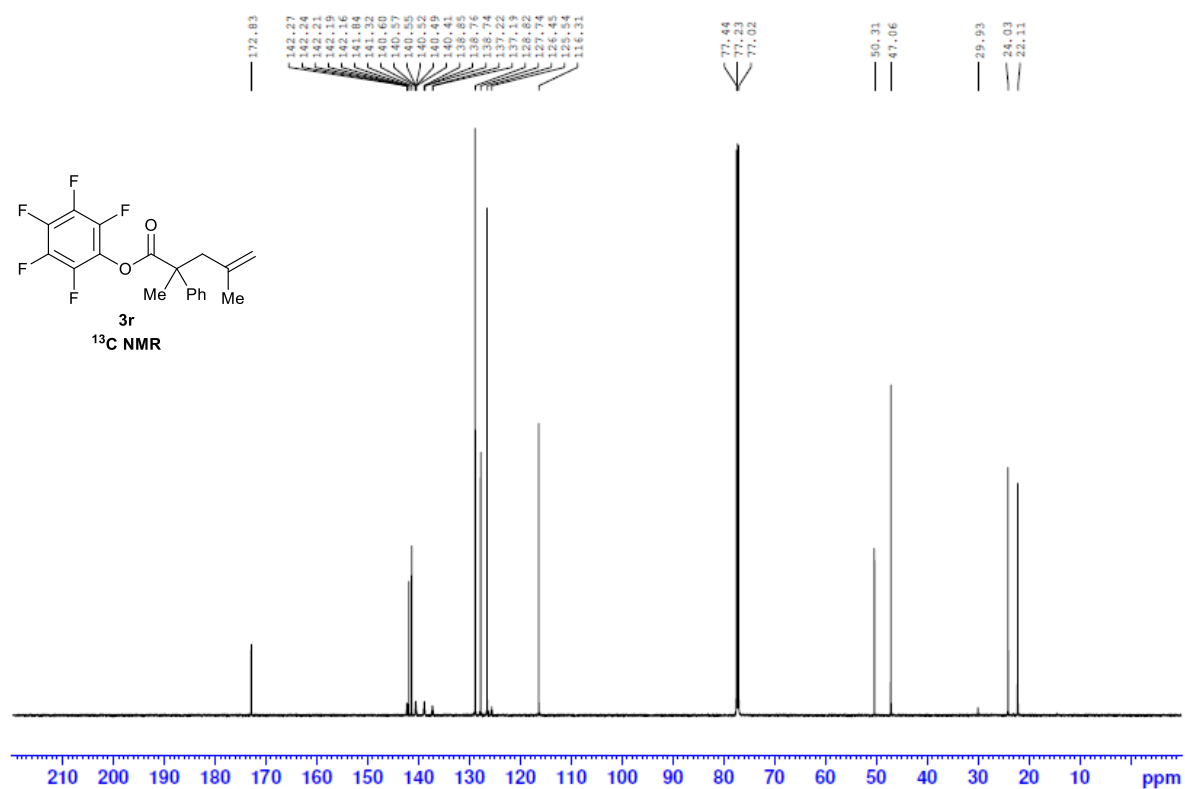

### HPLC of (±)-3s:

DAD1 A, Sig=254,4 Ref=off (NESSAN150223 2023-02-23 17-48-16\001-0101.D)

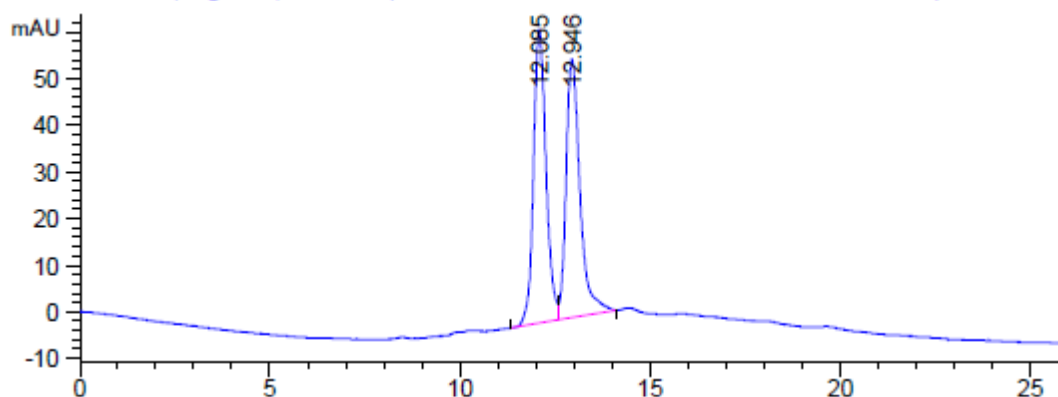

DAD1 B, Sig=225,4 Ref=off (NESSAN150223 2023-02-23 17-48-16\001-0101.D)

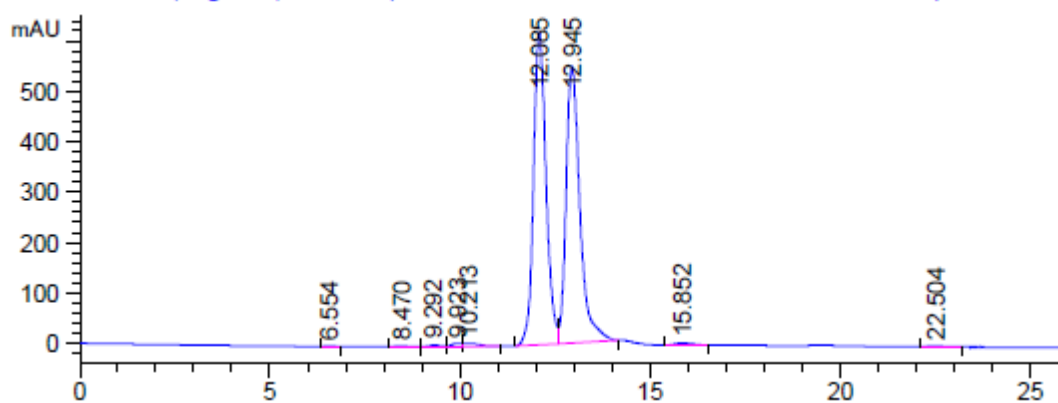

Signal 1: DAD1 A, Sig=254,4 Ref=off

| Peak # | RetTime [min] | Type | Width [min] | Area [mAU*s] | Height [mAU] | Area %  |
|--------|---------------|------|-------------|--------------|--------------|---------|
| 1      | 12.085        | BV   | 0.3522      | 1444.82642   | 62.86125     | 37.9977 |
| 2      | 12.946        | VB   | 0.3881      | 1415.11243   | 55.38816     | 37.2162 |
| 3      | 30.425        | BB   | 0.6422      | 496.19916    | 9.12730      | 13.0496 |
| 4      | 40.865        | BBA  | 0.6233      | 446.26981    | 8.57286      | 11.7365 |

Totals : 3802.40781 135.94958

### HPLC of (-)-3s:

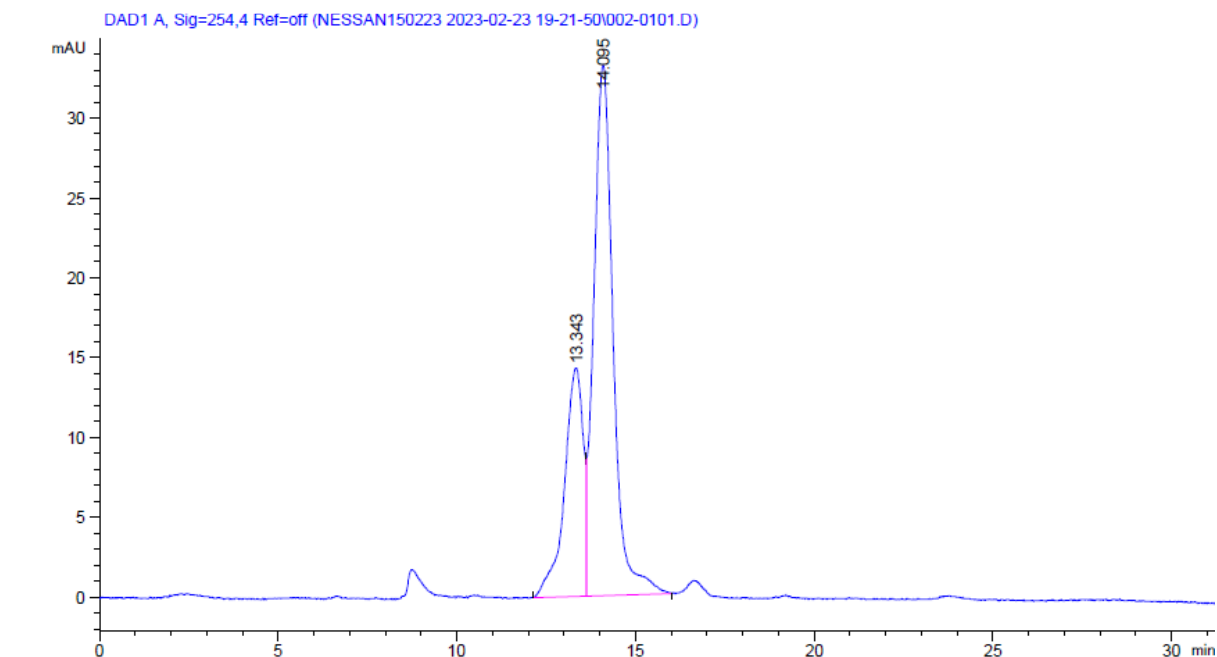

Signal 1: DAD1 A, Sig=254,4 Ref=off

| Peak # | RetTime [min] | Type | Width [min] | Area [mAU*s] | Height [mAU] | Area %  |
|--------|---------------|------|-------------|--------------|--------------|---------|
| 1      | 13.343        | BV   | 0.4815      | 521.22314    | 14.29210     | 29.3481 |
| 2      | 14.095        | VB   | 0.5607      | 1254.77966   | 33.21686     | 70.6519 |

Totals : 1776.00281 47.50896

AI-14-25

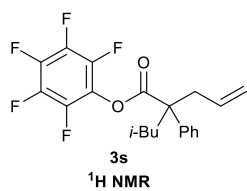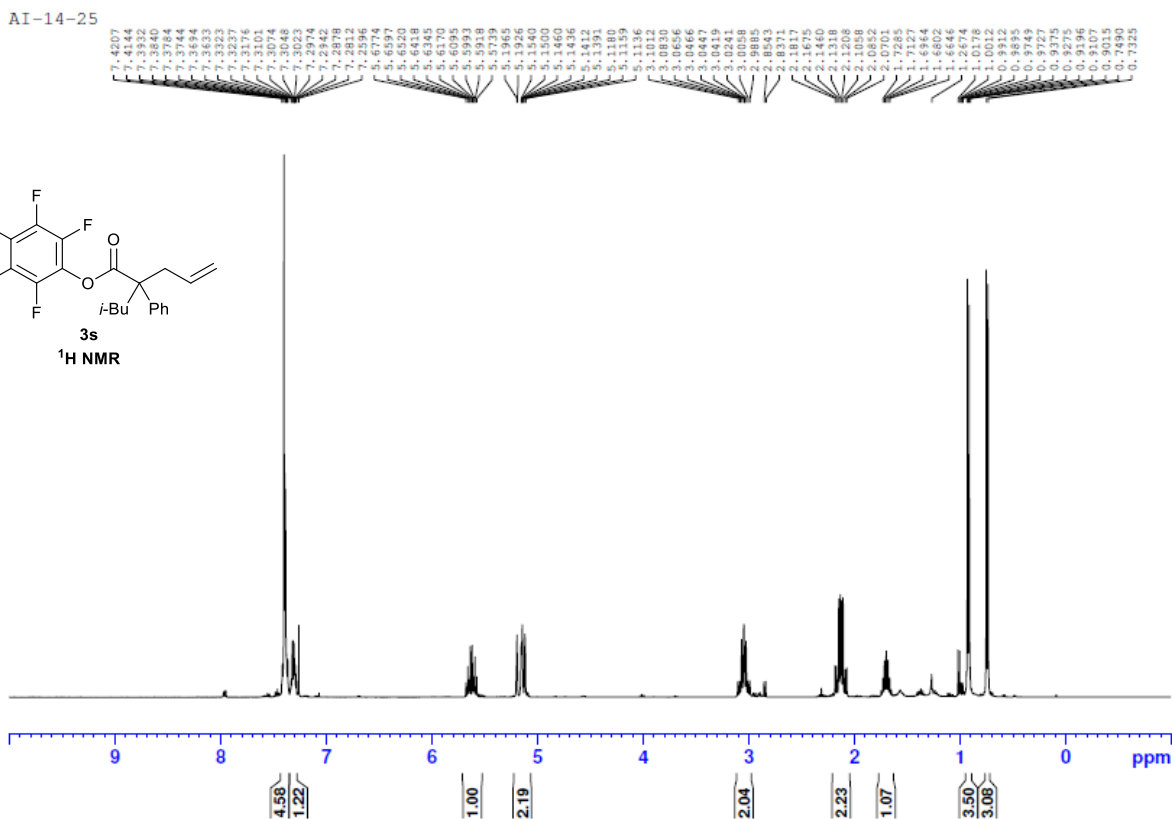

AI-14-25 13C

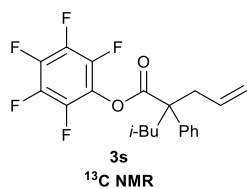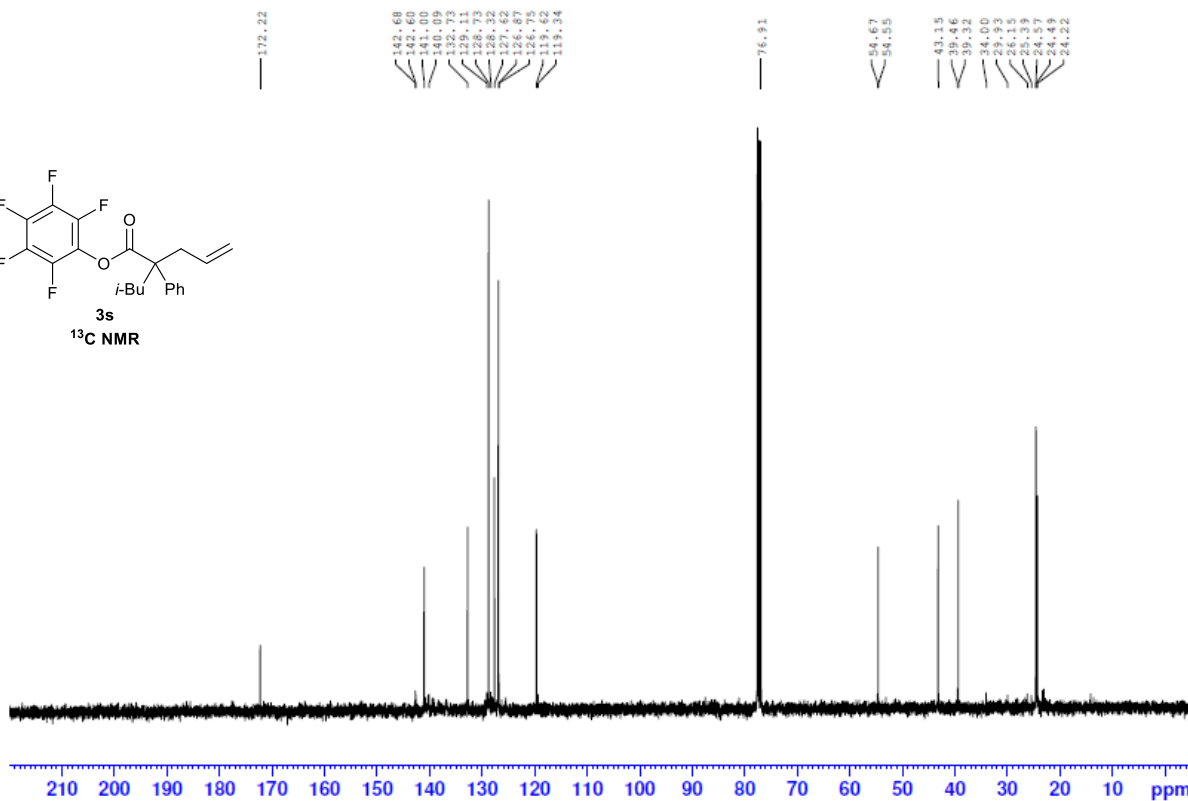

HPLC of (±)-3t:

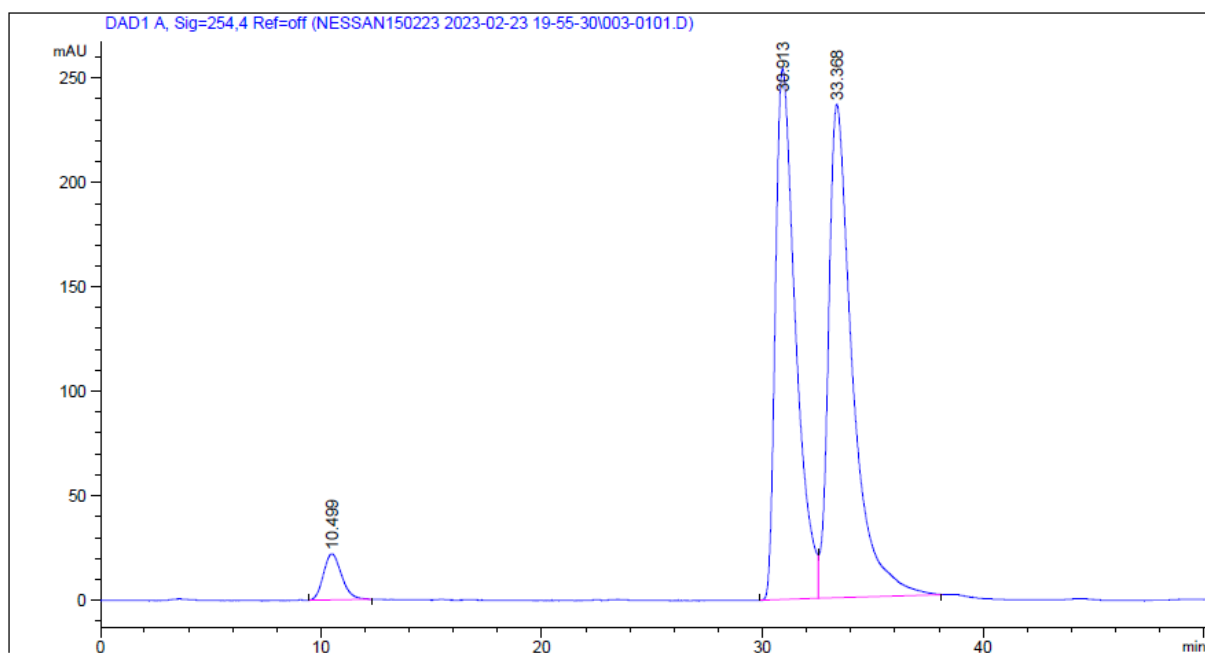

Signal 1: DAD1 A, Sig=254,4 Ref=off

| Peak #   | RetTime [min] | Type | Width [min] | Area [mAU*s] | Height [mAU] | Area %  |
|----------|---------------|------|-------------|--------------|--------------|---------|
| 1        | 10.499        | BB   | 0.7713      | 1253.76489   | 21.98618     | 3.5586  |
| 2        | 30.913        | BV   | 0.9330      | 1.61216e4    | 254.49852    | 45.7578 |
| 3        | 33.368        | VB   | 1.0855      | 1.78571e4    | 236.34566    | 50.6836 |
| Totals : |               |      |             | 3.52324e4    | 512.83036    |         |

# HPLC of (+)-3t:

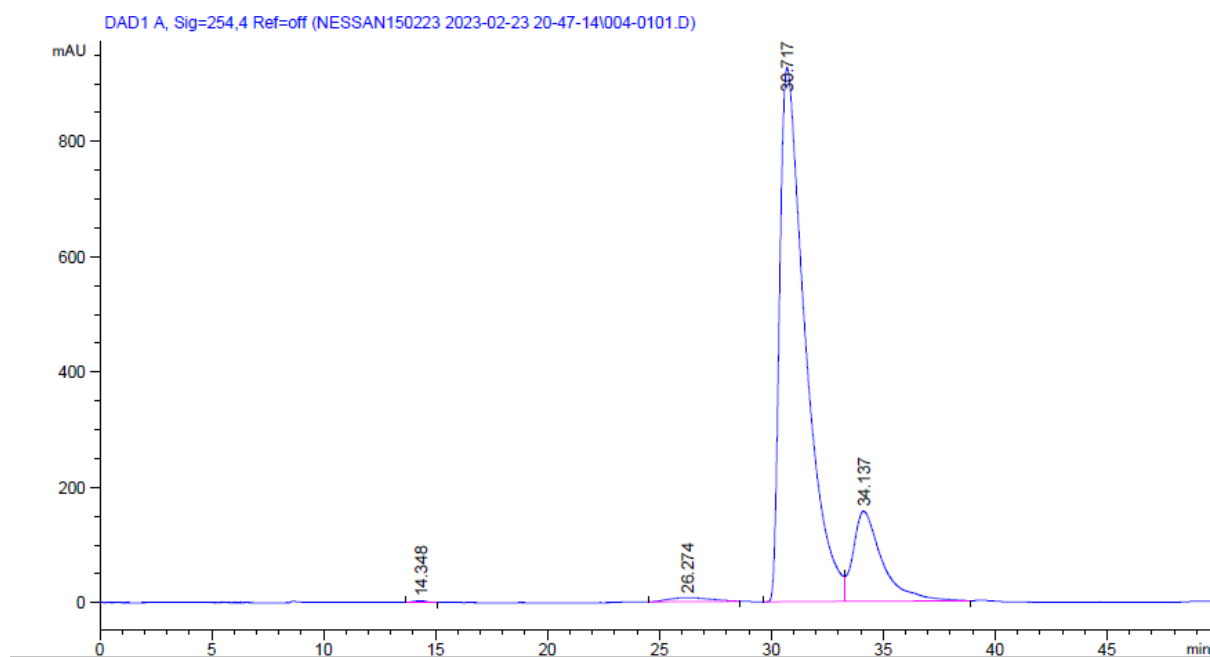

Signal 1: DAD1 A, Sig=254,4 Ref=off

| Peak # | RetTime [min] | Type | Width [min] | Area [mAU*s] | Height [mAU] | Area %  |
|--------|---------------|------|-------------|--------------|--------------|---------|
| 1      | 14.348        | BB   | 0.4477      | 110.85670    | 2.95449      | 0.1254  |
| 2      | 26.274        | BB   | 1.4780      | 864.31897    | 6.85980      | 0.9774  |
| 3      | 30.717        | BV   | 1.1107      | 7.33043e4    | 926.83331    | 82.8962 |
| 4      | 34.137        | VB   | 1.2717      | 1.41495e4    | 156.36760    | 16.0010 |

Totals : 8.84290e4 1093.01520

AI-14-23

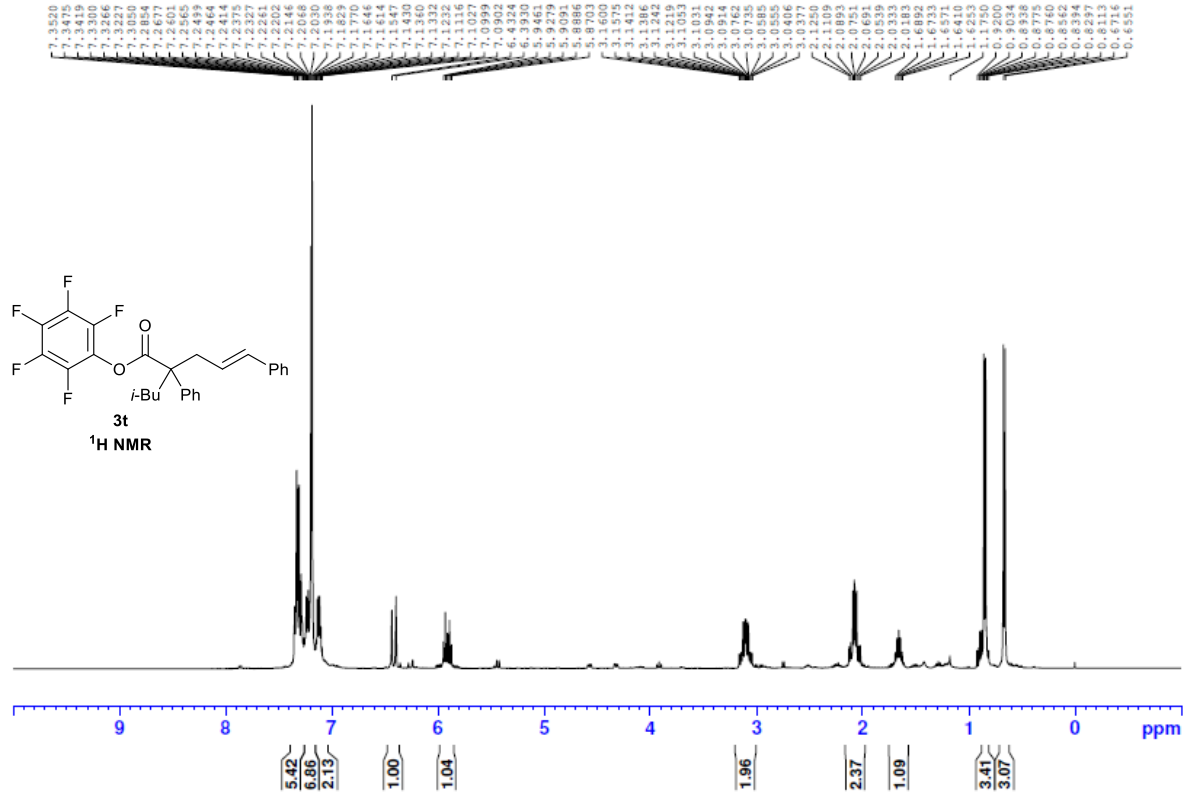

AI-13-23 13C

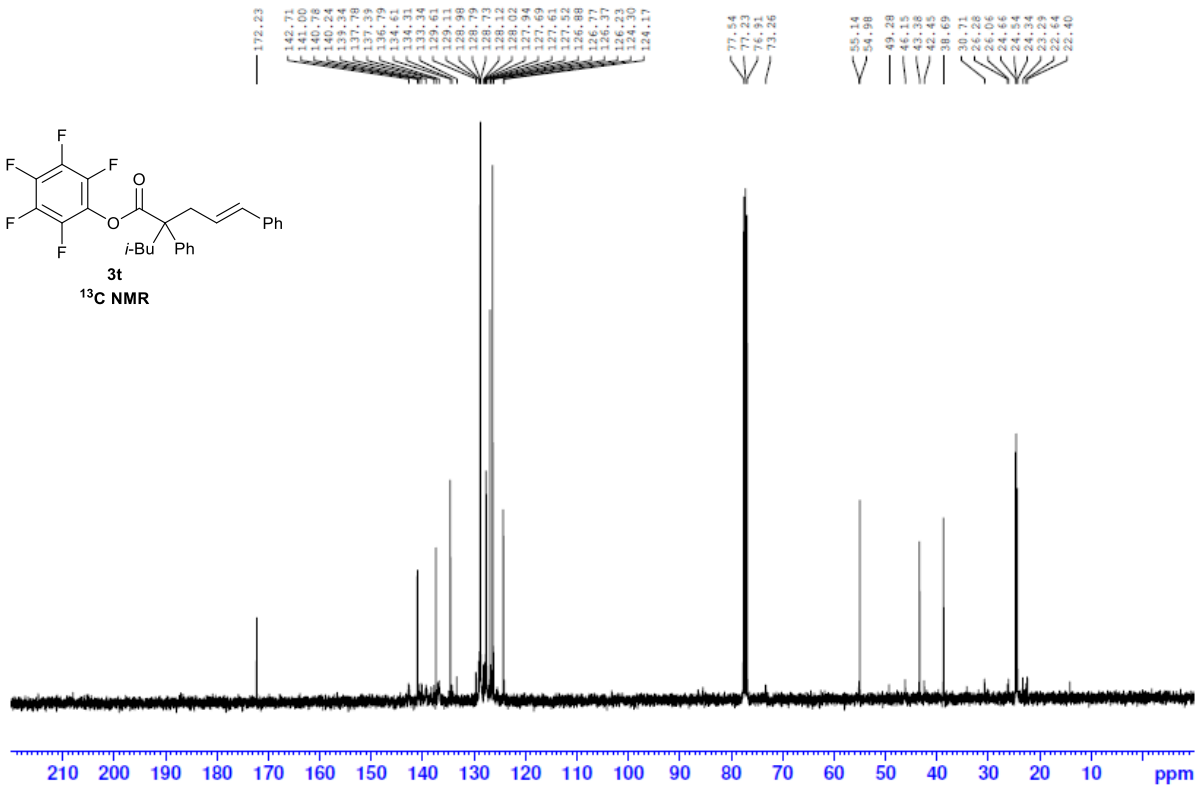



HPLC of (±)-3u:

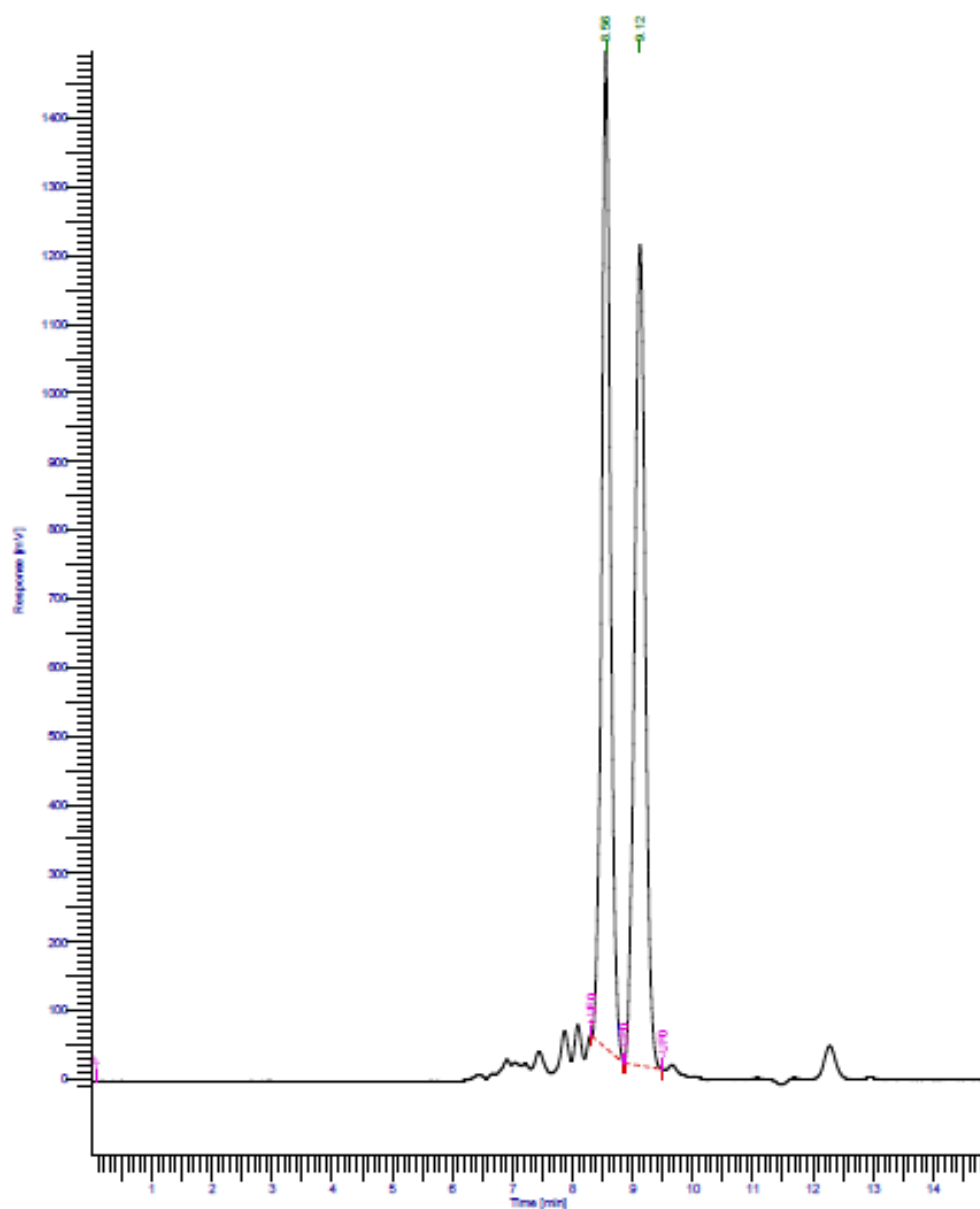

| Peak # | Time [min] | Area [µV·s] | Height [µV] | Area [%] | Norm. Area [%] | BL  | Area/Height [s] |
|--------|------------|-------------|-------------|----------|----------------|-----|-----------------|
| 1      | 8.558      | 14898360.13 | 1.45e+06    | 50.00    | 50.00          | *MM | 10.2544         |
| 2      | 9.123      | 14896665.77 | 1.20e+06    | 50.00    | 50.00          | *MM | 12.4589         |
|        |            | 29795025.90 | 2.65e+06    | 100.00   | 100.00         |     |                 |

HPLC of enantioenriched **3u**:

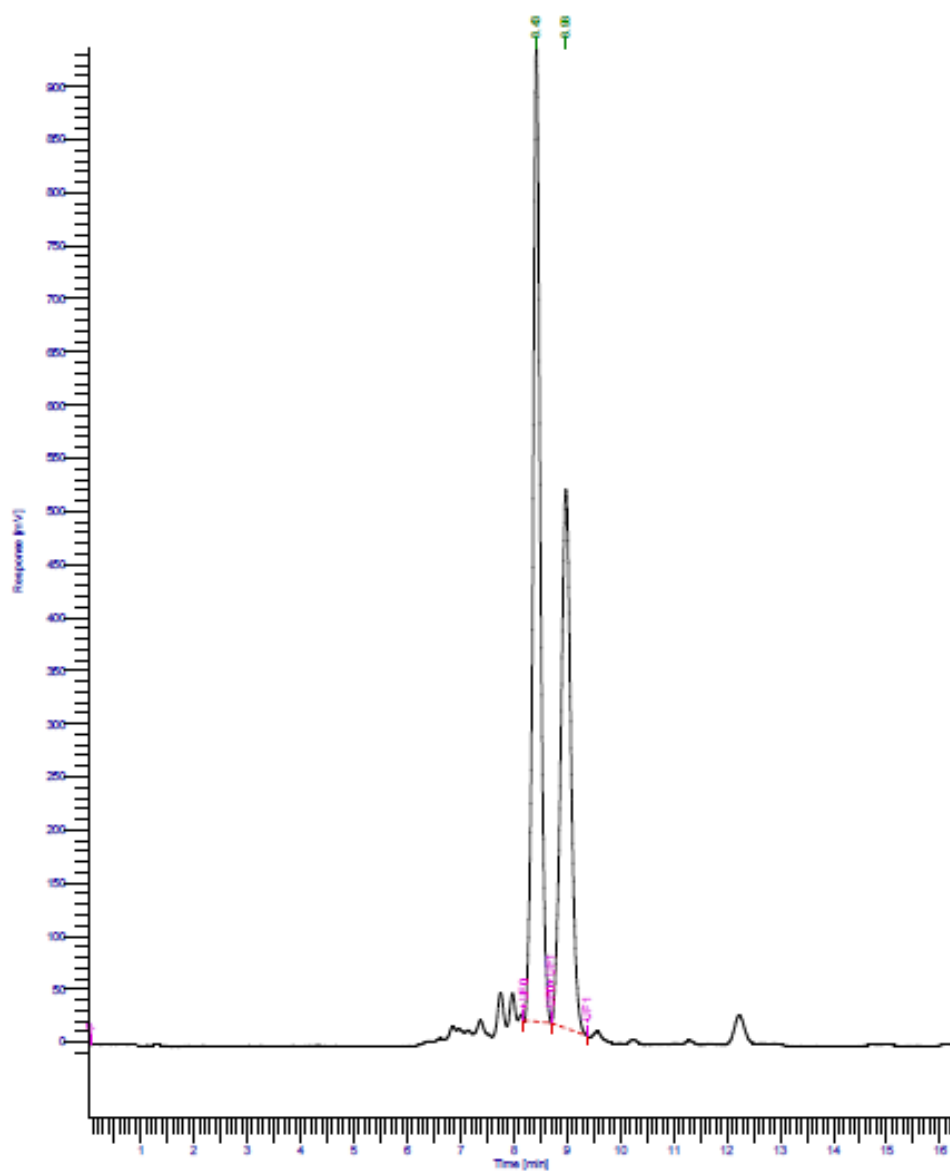

| Peak # | Time [min] | Area [µV·s] | Height [µV] | Area [%] | Norm. Area [%] | BL  | Area/Height [s] |
|--------|------------|-------------|-------------|----------|----------------|-----|-----------------|
| 1      | 8.426      | 8868226.34  | 917258.63   | 56.98    | 56.98          | *MM | 9.6682          |
| 2      | 8.983      | 6694931.12  | 507332.59   | 43.02    | 43.02          | *MM | 13.1963         |
|        |            | 15563157.46 | 1.42e+06    | 100.00   | 100.00         |     |                 |

AI-14-43

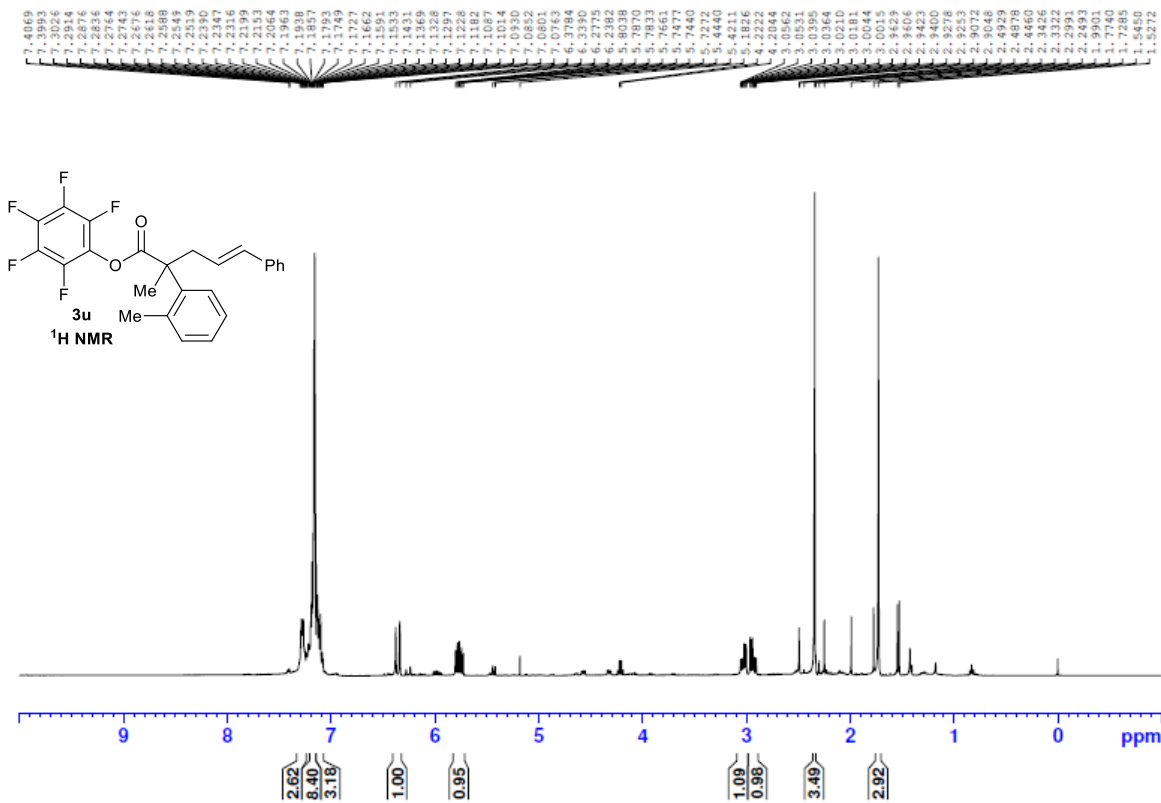

AI-13-43 13C

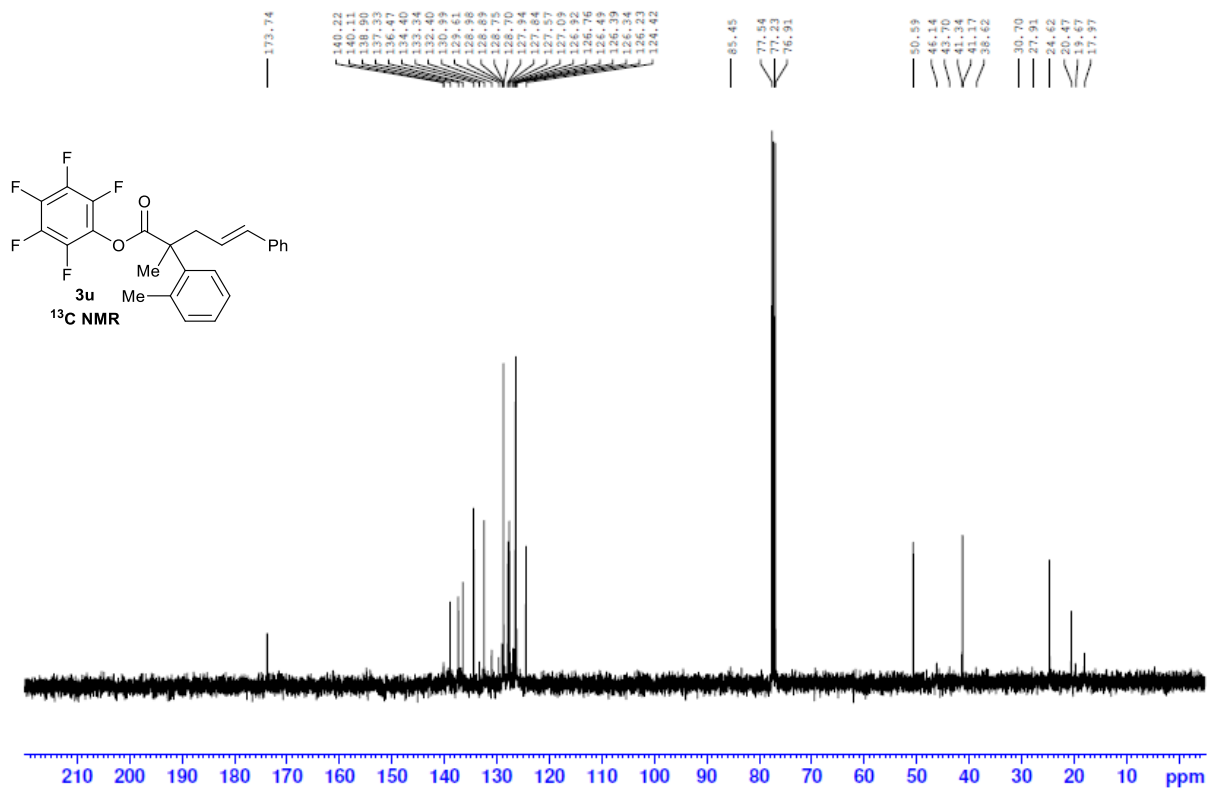

HPLC of (±)-3v:

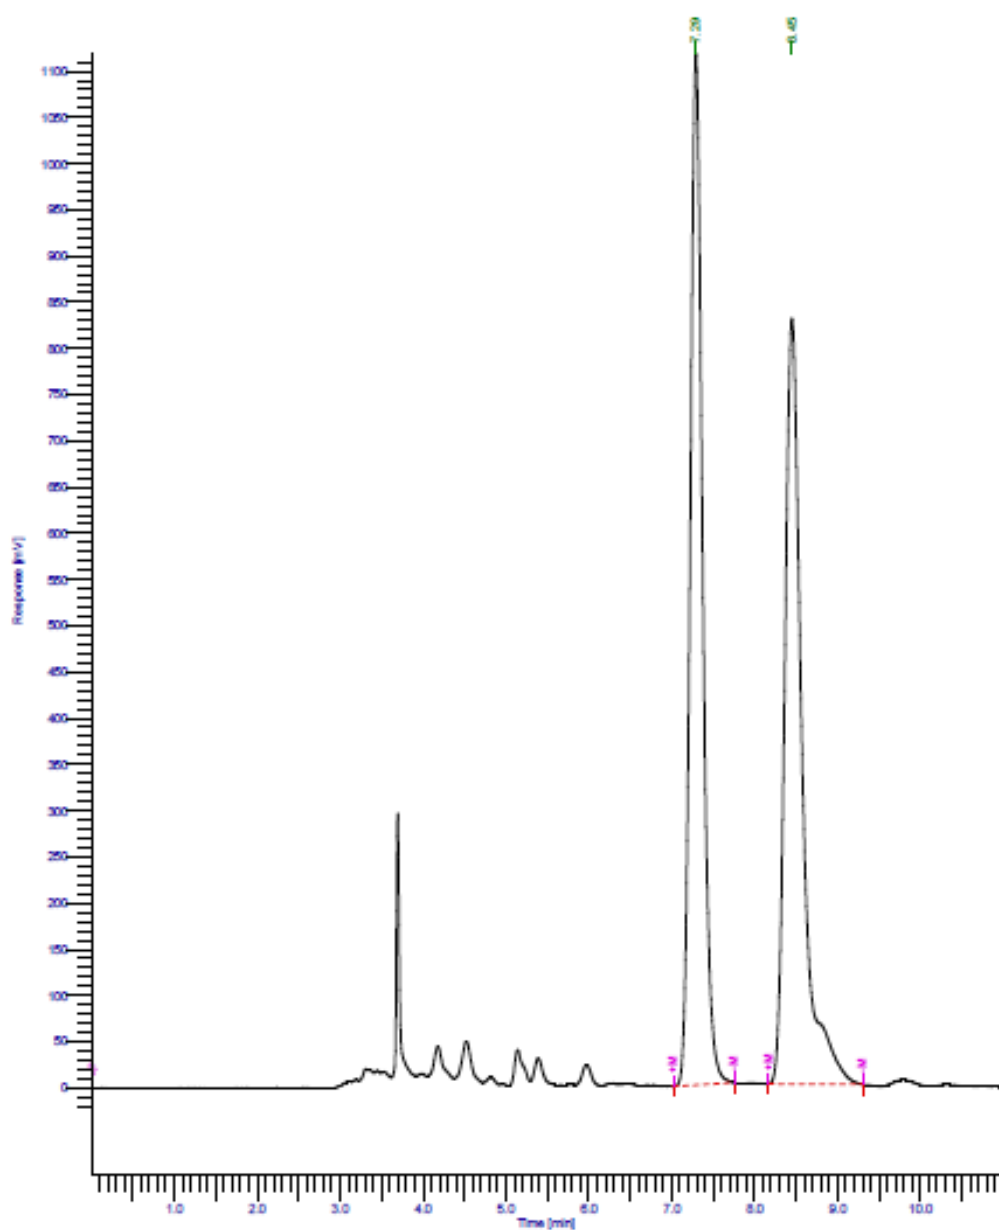

| Peak # | Time [min] | Area [µV·s] | Height [µV] | Area [%] | Norm. Area [%] | BL  | Area/Height [s] |
|--------|------------|-------------|-------------|----------|----------------|-----|-----------------|
| 1      | 7.291      | 11510187.71 | 1.12e+06    | 49.15    | 49.15          | *BB | 10.3037         |
| 2      | 8.450      | 11909563.88 | 828391.72   | 50.85    | 50.85          | *BB | 14.3767         |
|        |            | 23419751.60 | 1.95e+06    | 100.00   | 100.00         |     |                 |

HPLC of (+)-**3v**:

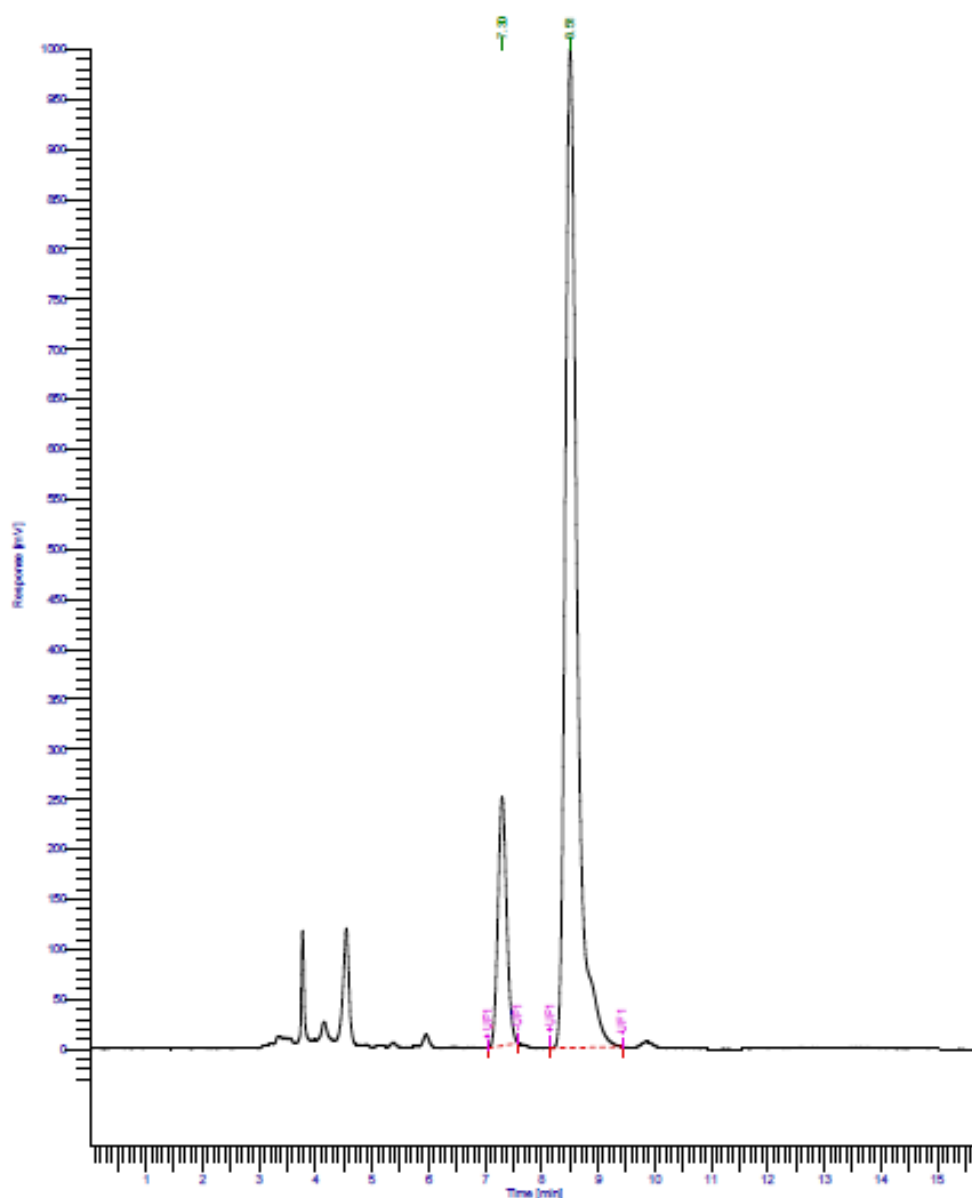

| Peak # | Time [min] | Area [µV·s] | Height [µV] | Area [%] | Norm. Area [%] | BL  | Area/Height [s] |
|--------|------------|-------------|-------------|----------|----------------|-----|-----------------|
| 1      | 7.304      | 2669943.60  | 248753.77   | 15.44    | 15.44          | *MM | 10.7333         |
| 2      | 8.507      | 14623834.84 | 998752.93   | 84.56    | 84.56          | *MM | 14.6421         |
|        |            | 17293778.43 | 1.25e+06    | 100.00   | 100.00         |     |                 |

AI-14-45

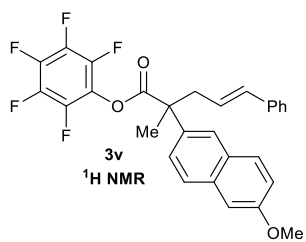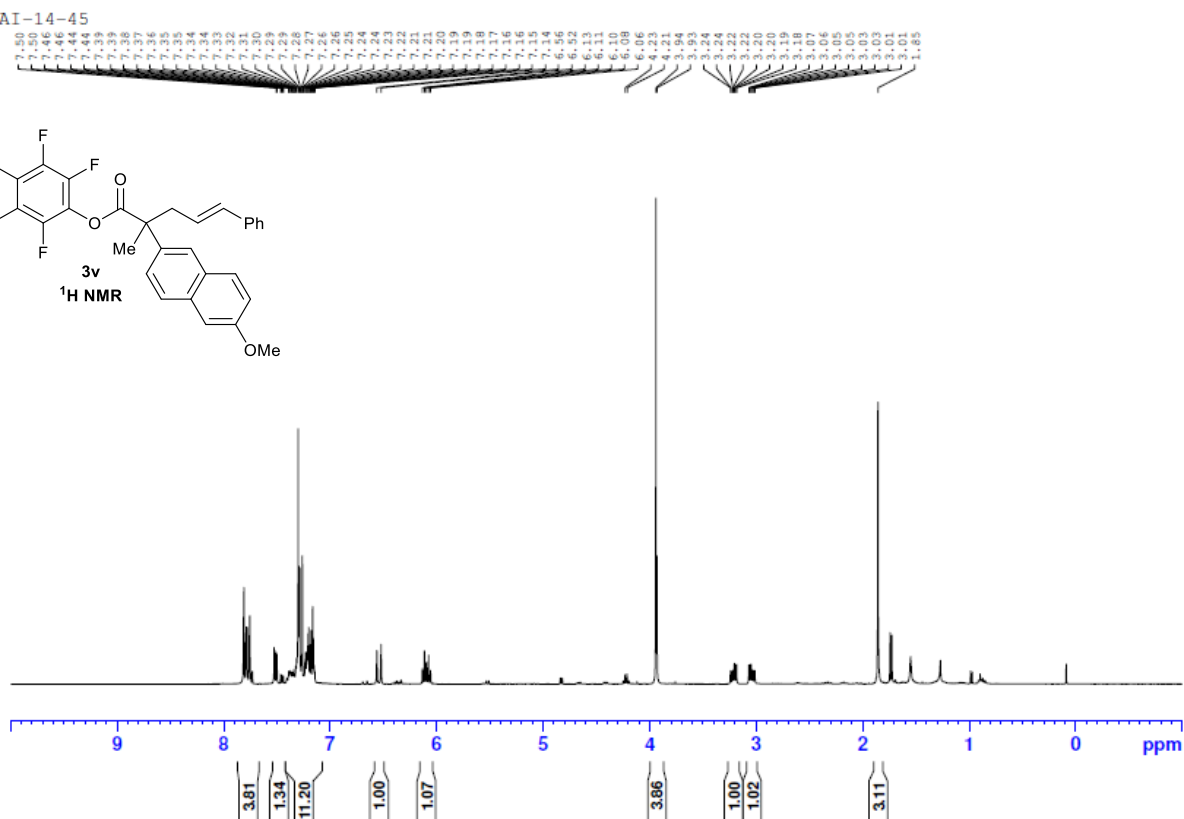

AI-14-45 13C

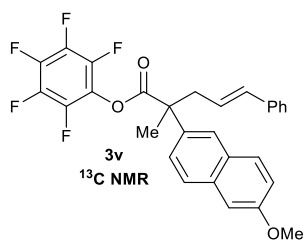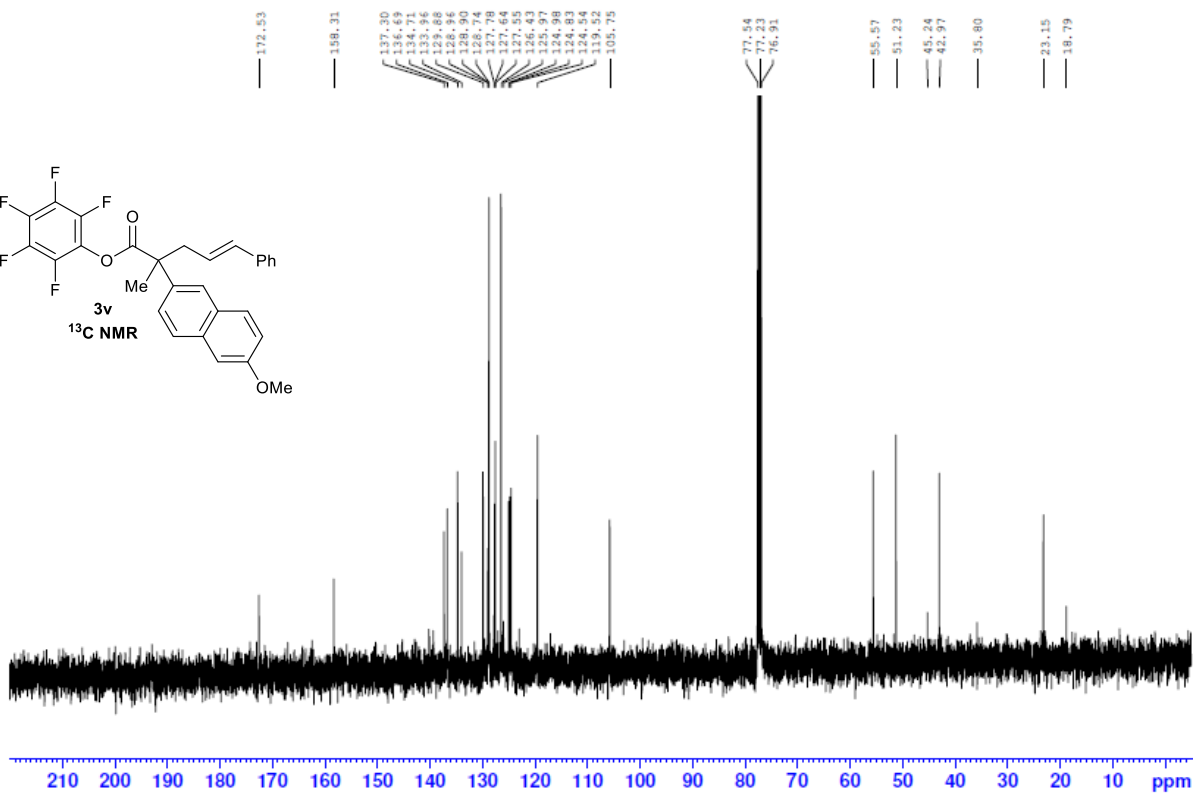

# HPLC of (±)-3w:

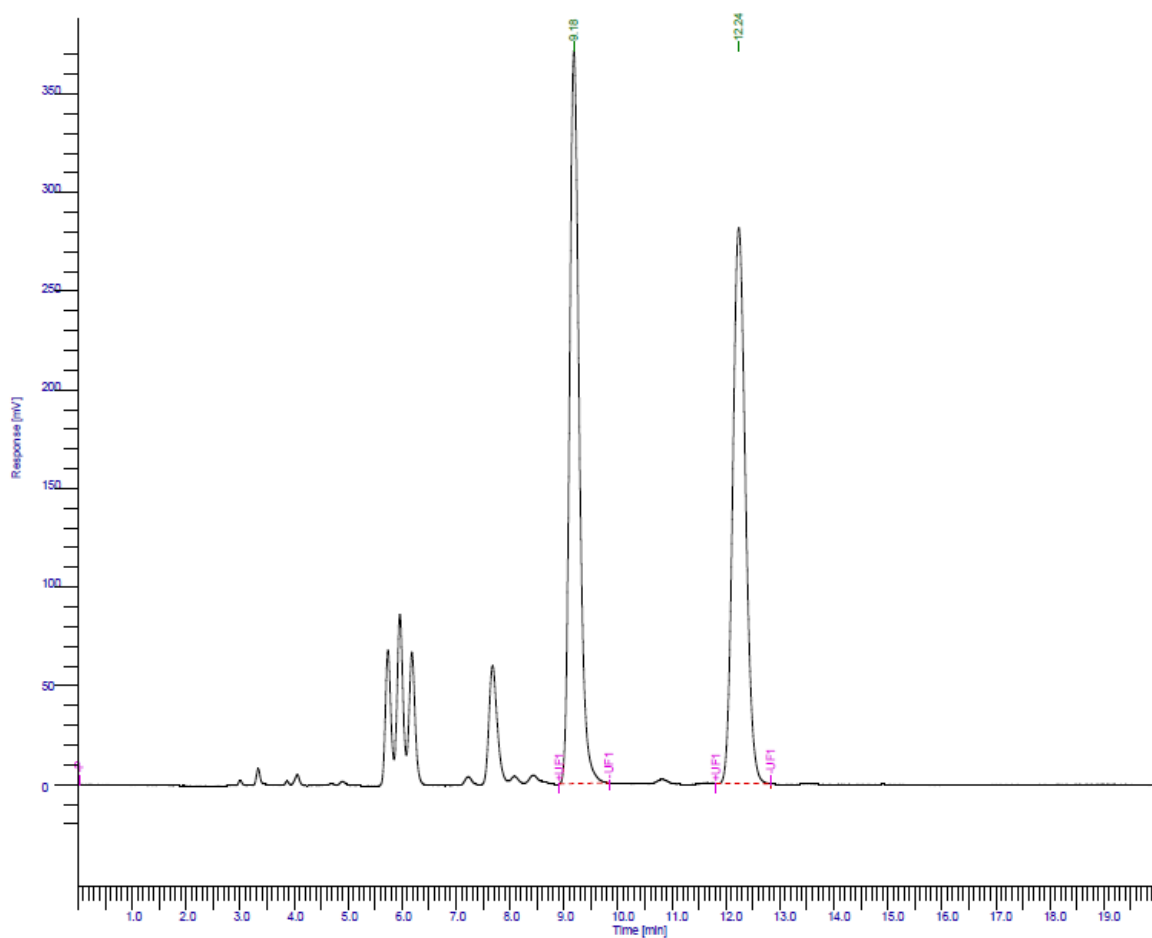

| Peak # | Time [min] | Area [μV·s] | Height [μV] | Area [%] | Norm. Area [%] | BL  | Area/Height [s] |
|--------|------------|-------------|-------------|----------|----------------|-----|-----------------|
| 1      | 9.181      | 4618201.68  | 371453.09   | 50.40    | 50.40          | *MM | 12.4328         |
| 2      | 12.239     | 4545394.99  | 281707.42   | 49.60    | 49.60          | *MM | 16.1352         |
|        |            | 9163596.66  | 653160.51   | 100.00   | 100.00         |     |                 |

### HPLC of enantioenriched **3w**:

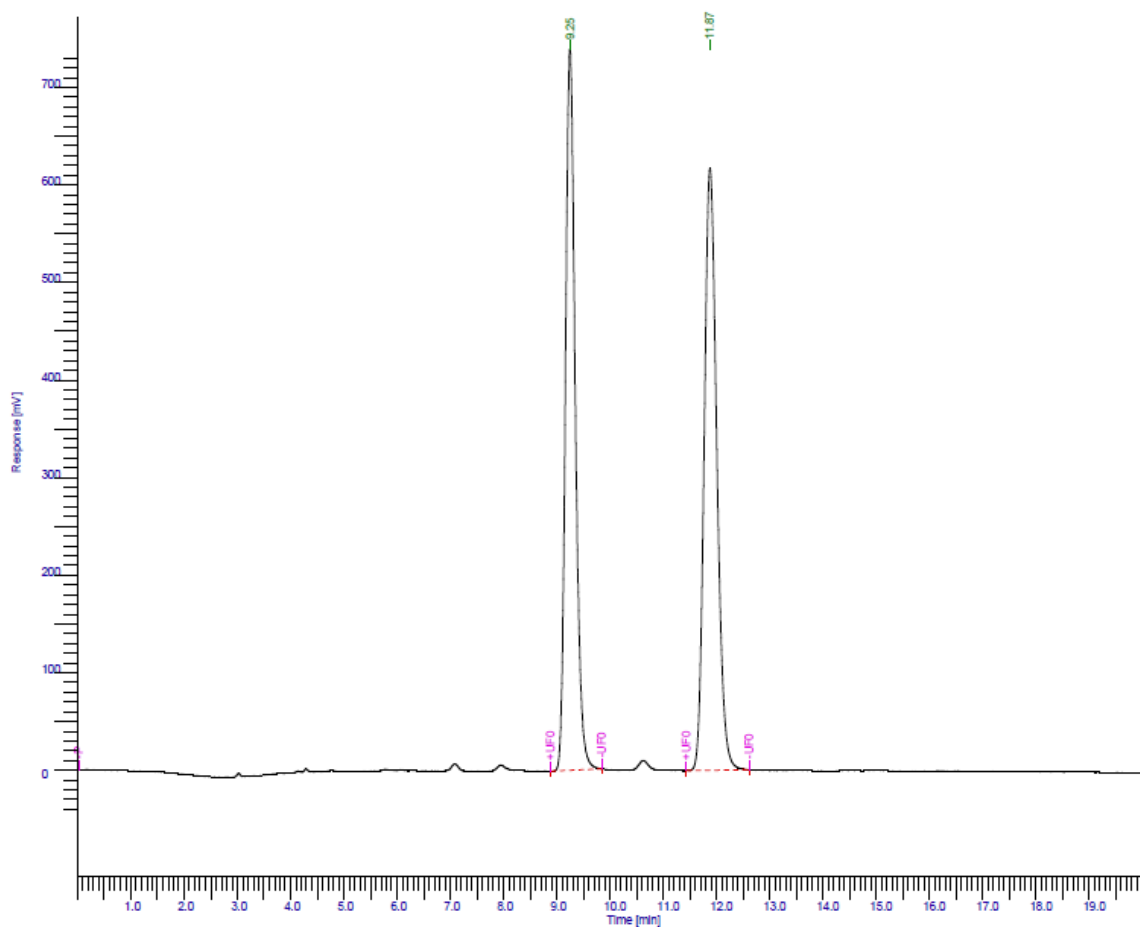

| Peak # | Time [min] | Area [ $\mu\text{V}\cdot\text{s}$ ] | Height [ $\mu\text{V}$ ] | Area [%] | Norm. Area [%] | BL  | Area/Height [s] |
|--------|------------|-------------------------------------|--------------------------|----------|----------------|-----|-----------------|
| 1      | 9.247      | 9439367.62                          | 738986.58                | 48.28    | 48.28          | *MM | 12.7734         |
| 2      | 11.873     | 10113408.05                         | 616990.69                | 51.72    | 51.72          | *MM | 16.3915         |
|        |            | 19552775.67                         | 1.36e+06                 | 100.00   | 100.00         |     |                 |



S521 AI 14-79

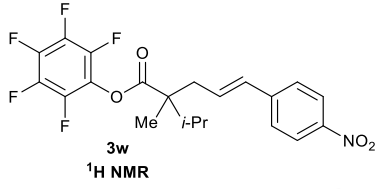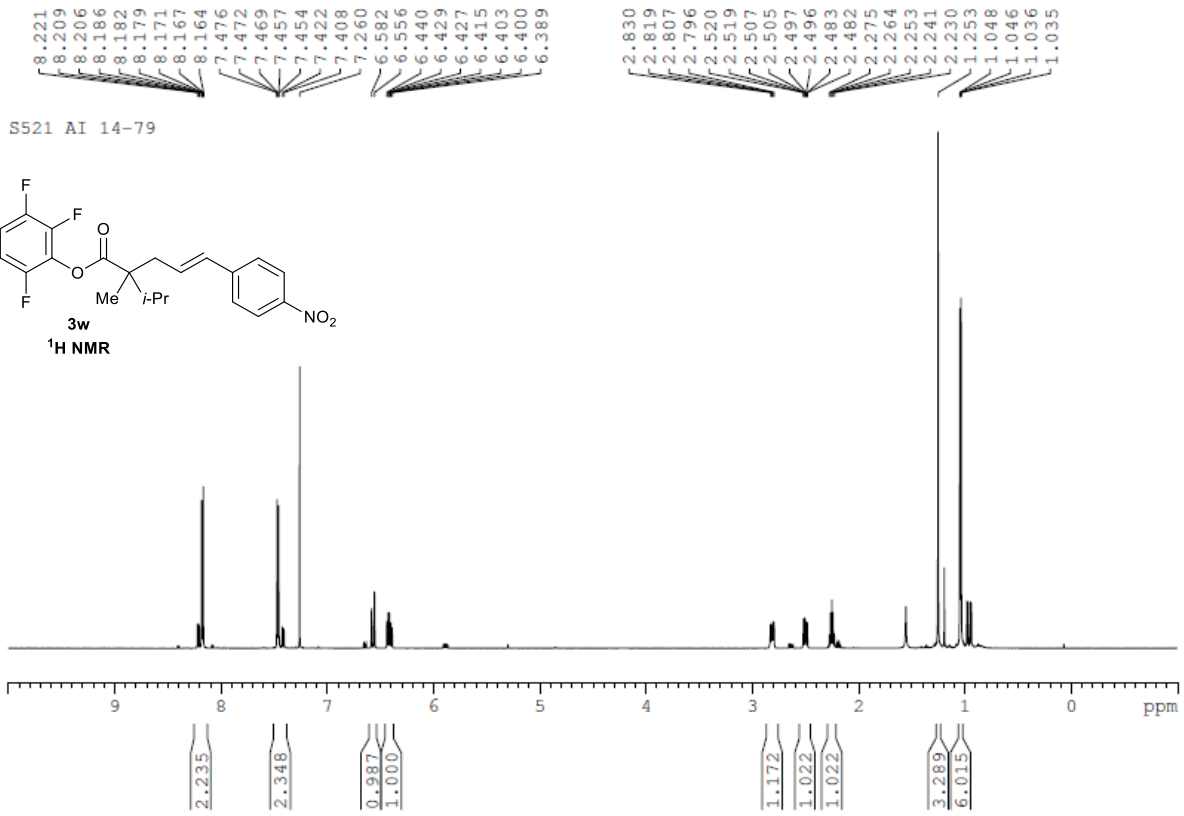

AI-14-79 13C

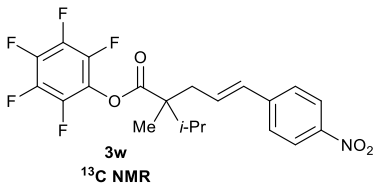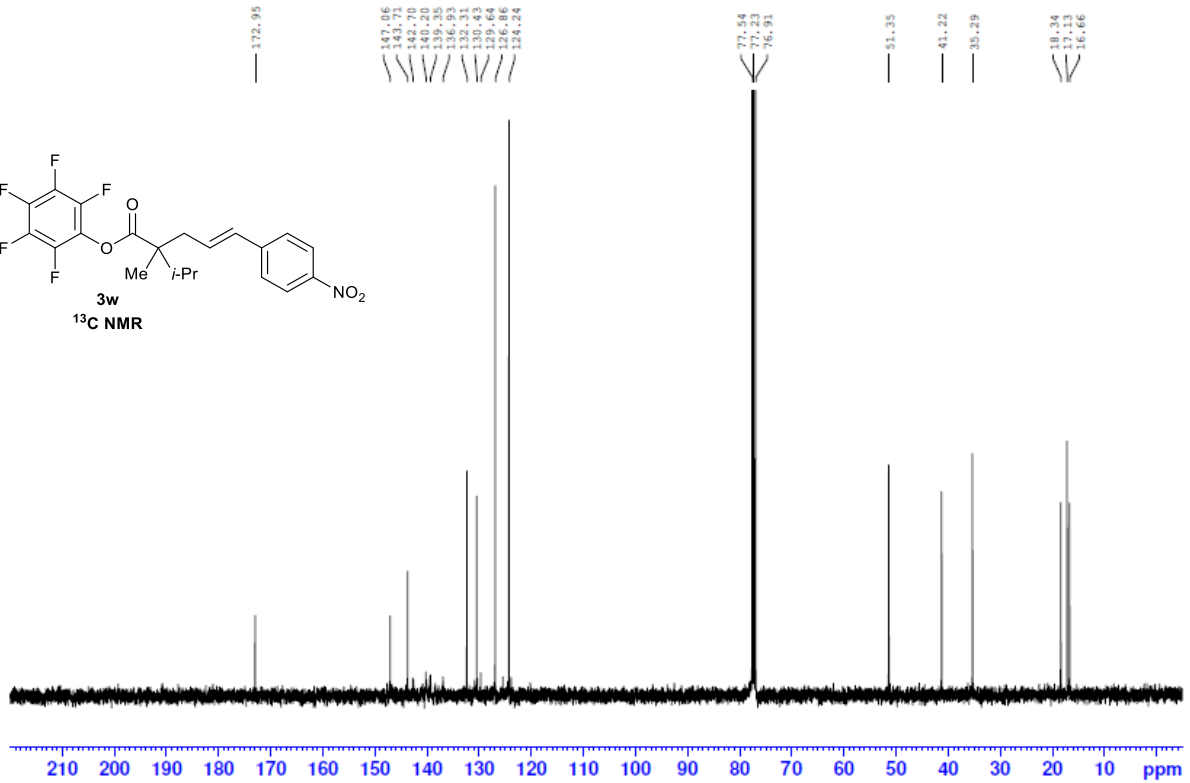

AI-14-80

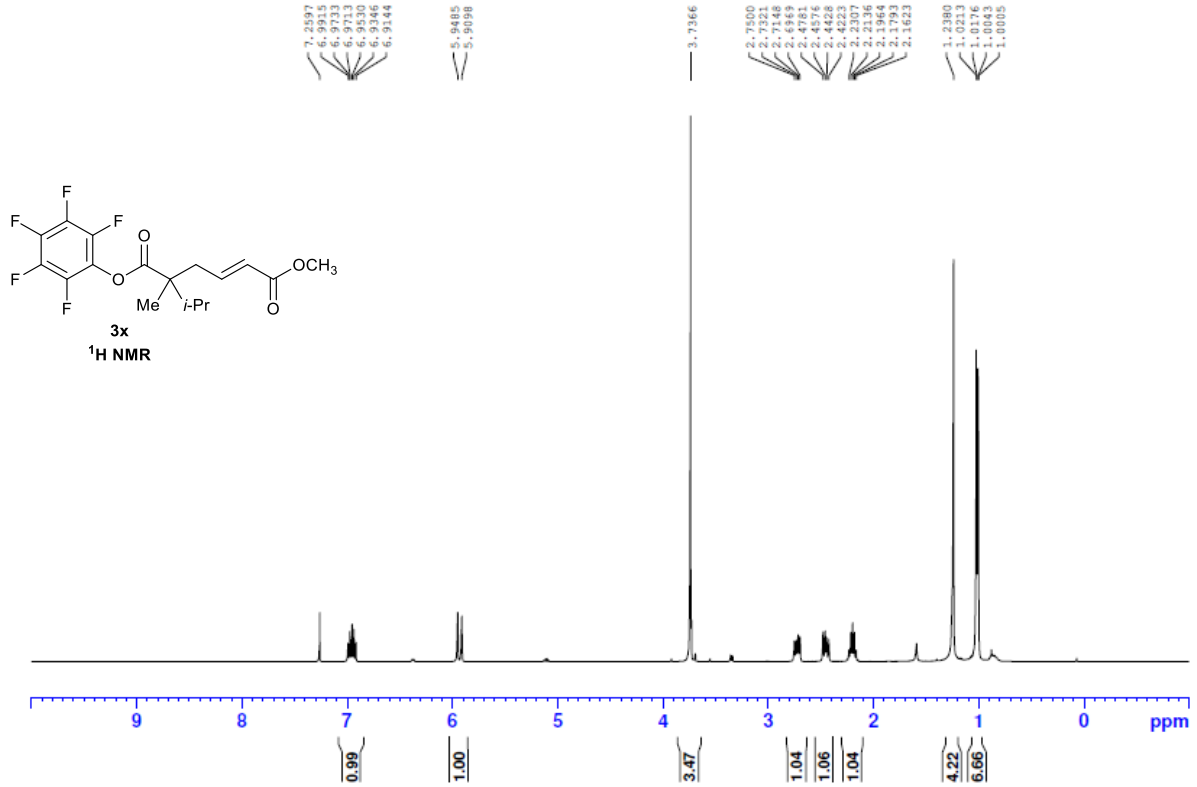

AI-13-80 13C

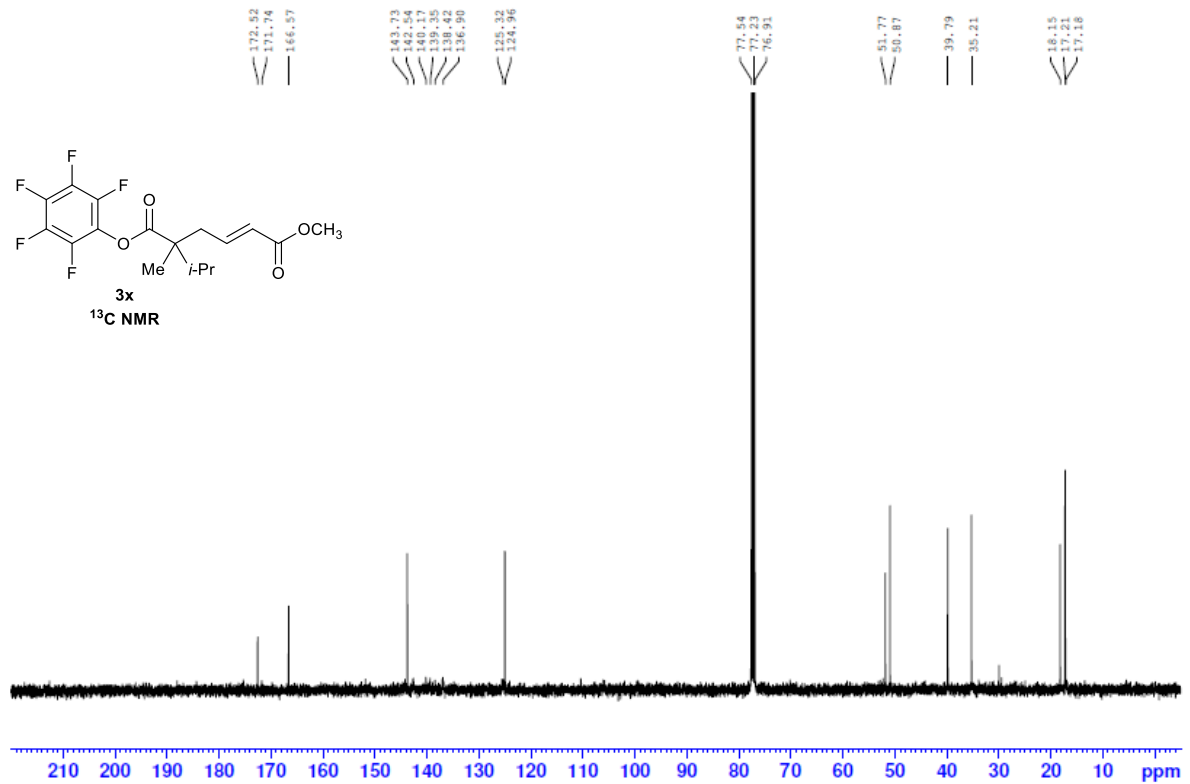

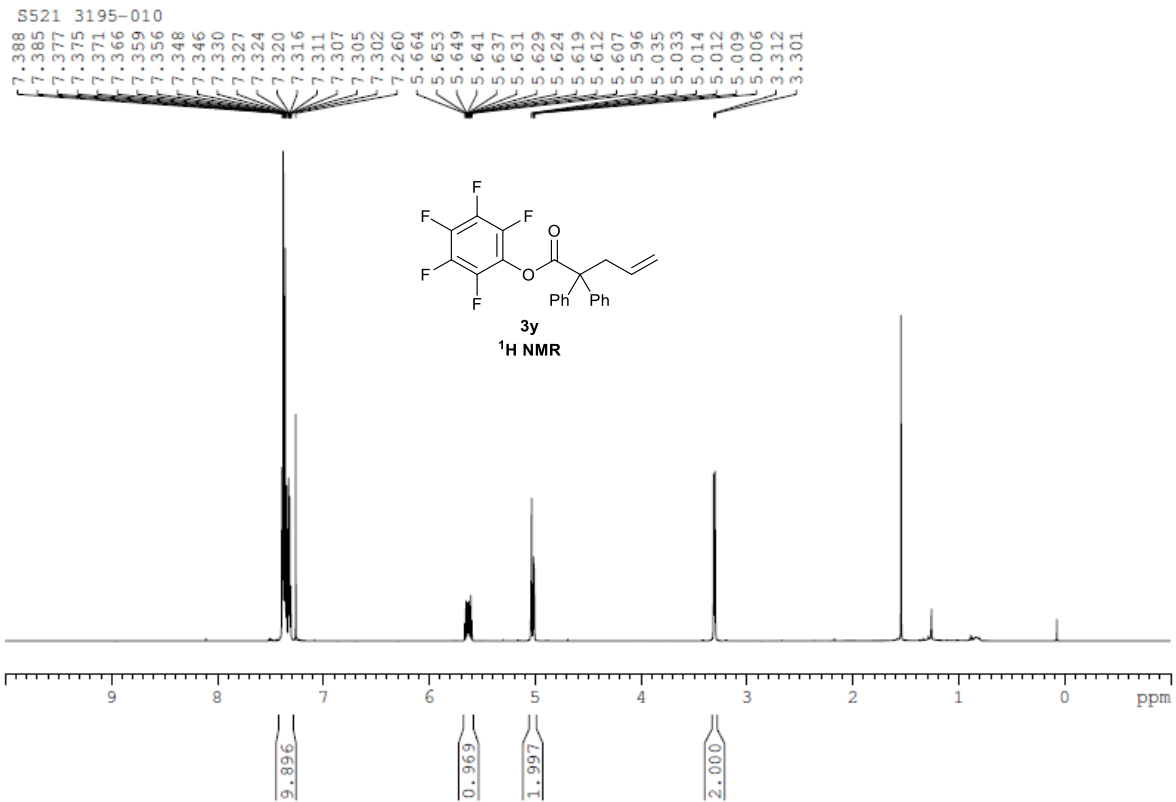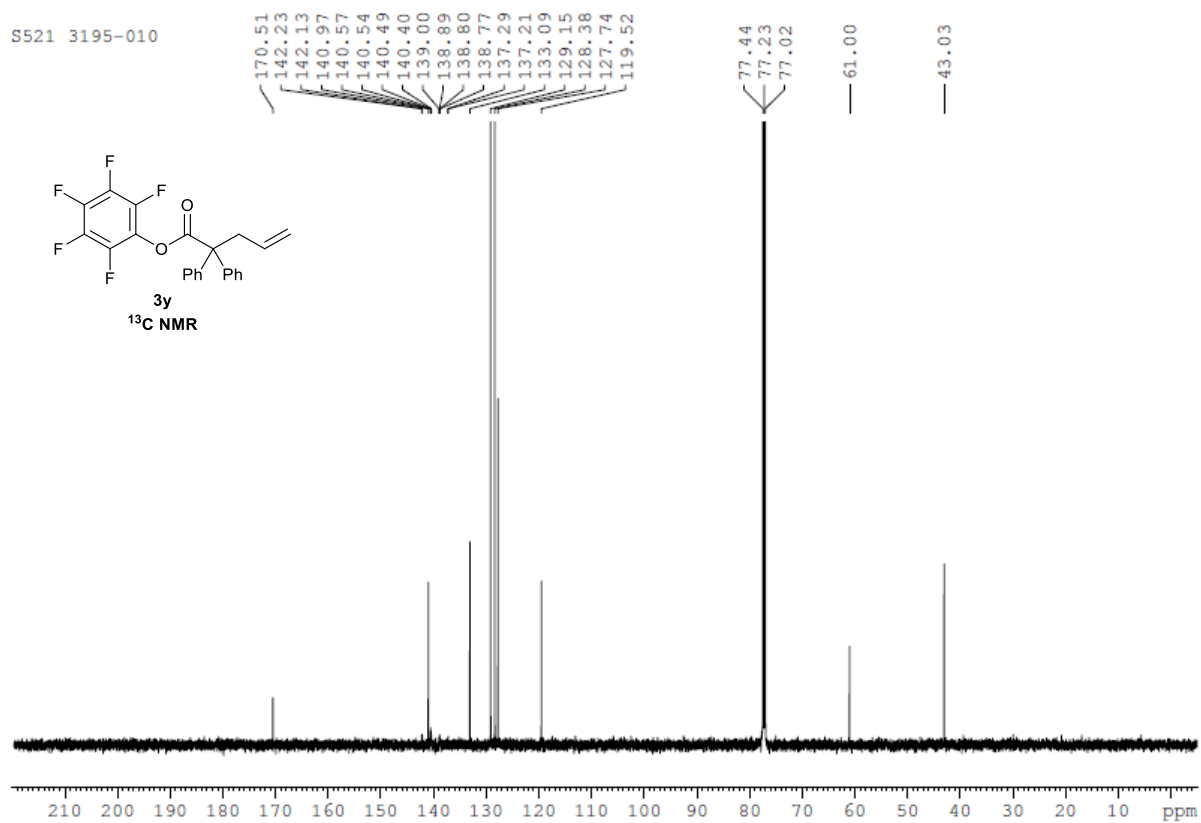

Supplement: d4cc00057a2.pdf [file d4cc00057a2.pdf]
